## PRMT5 promotes vascular morphogenesis

1  
2  
3  
4  
5  
6  
7  
8  
9  
10  
11  
12  
13  
14  
15  
16  
17  
18  
19  
20  
21

### **Prmt5 promotes vascular morphogenesis independently of its methyltransferase activity.**

Aurélie Quillien<sup>1\*</sup>, Manon Boulet<sup>1,2</sup>, Séverine Ethuin<sup>1</sup>, Laurence Vandel<sup>1,2\*</sup>

<sup>1</sup>Centre de Biologie du Développement (CBD), Centre de Biologie Intégrative (CBI),  
Université de Toulouse, CNRS, UPS, France

<sup>2</sup>Current affiliation : Université Clermont Auvergne, CNRS, Inserm, GReD, F-3000 Clermont-  
Ferrand, France

\*Corresponding Authors

Aurélie Quillien (aurelie.quillien@gmail.com)

Laurence Vandel (laurence.vandel@uca.fr)

## PRMT5 promotes vascular morphogenesis

### 22 **ABSTRACT**

23

24 During development, the vertebrate vasculature undergoes major growth and remodeling.

25 While the transcriptional cascade underlying blood vessel formation starts to be better

26 characterized, little is known concerning the role and mode of action of epigenetic enzymes

27 during this process. Here, we explored the role of the Protein Arginine Methyl Transferase

28 Prmt5 during blood vessel formation and hematopoiesis in zebrafish. Through the generation

29 of a *prmt5* mutant, we highlighted a key role of Prmt5 in both hematopoiesis and blood vessel

30 formation. Notably, we showed that Prmt5 promotes vascular morphogenesis through the

31 transcriptional control of ETS transcription factors and adhesion proteins in endothelial cells.

32 Interestingly, we found that Prmt5 methyltransferase activity is not required to regulate gene

33 expression, and the comparison of chromatin architecture impact on reporter genes expression

34 leads us to propose that Prmt5 rather regulates transcription by acting as a scaffold protein

35 that facilitates chromatin looping in these cells.

36

### 37 **Key words**

38 Prmt5; zebrafish; angiogenesis; hematopoiesis; endothelial cells; chromatin looping

39

40

41

42

43

44

45

46

47

## PRMT5 promotes vascular morphogenesis

### 48 INTRODUCTION

49 Blood vessel formation is an essential developmental process required for the survival of all  
50 vertebrates and much effort has been devoted to understand the molecular pathways and to  
51 identify key molecules that regulate different aspects of this process. Interestingly, the vascular  
52 anatomy and the mechanisms involved in vessel formation are highly conserved among  
53 vertebrates (for a review, (Isogai et al., 2001)). Hence, in the past two decades, zebrafish has  
54 been proven to be a useful model to study vascular morphogenesis and blood cell formation  
55 *in vivo* (Beis and Stainier, 2006; Lawson and Weinstein, 2002a; Thisse and Zon, 2002).

56 In vertebrates, blood cell formation is tightly associated with the development of the vascular  
57 system. Hematopoietic Stem Cells (HSC), which give rise to the different blood cell lineages,  
58 emerge directly from the ventral part of the dorsal aorta, an area referred to as the hemogenic  
59 endothelium. Notably, the ETS transcription factor ETV2 functions as a master regulator for  
60 the formation of endothelial and hematopoietic cell lineages through the induction of both blood  
61 cells and vasculature transcriptional programs, in mouse and in zebrafish (Liu et al., 2015b;  
62 Wong et al., 2009). In endothelial cells, ETV2 regulates the expression of other ETS  
63 transcription factors, VEGF (Vascular Endothelial Growth factor) signaling receptors and  
64 effectors, Rho-GTPases and adhesion molecules (Liu et al., 2015b; Wong et al., 2009).  
65 Besides, adhesion molecules have been shown to be crucial players in vascular  
66 morphogenesis as Vascular Endothelial cadherin (VE-cad/ *cdh5*) and endothelial cell-selective  
67 adhesion molecule (*Esama*) are essential for junction remodeling and blood vessel elongation  
68 in zebrafish (Sauteur et al., 2017; Sauteur et al., 2014). Indeed, loss of function of both *cdh5*  
69 and *esama* leads to the formation of disconnected vessels and delayed lumen formation.  
70 Likewise, knock down of the scaffold protein Amolt2, which associates to VE-cadherin, also  
71 leads to sprout elongation defects and narrowed aortic lumen (Hultin et al., 2014). While the  
72 transcriptional cascade underlying blood vessel formation starts to be better characterized,  
73 little is known concerning the role and mode of action of epigenetic enzymes during this  
74 process. Even though chromatin-modifying enzymes have been described as central in

## PRMT5 promotes vascular morphogenesis

75 cardiovascular disease and development (Rosa-Garrido et al., 2018; Shailesh et al., 2018),  
76 only few examples illustrate in detail the role of epigenetic enzymes during blood vessel  
77 development. For instance, the chromatin-remodeling enzyme BRG1 affects early vascular  
78 development as well as hematopoiesis in mice (Griffin et al., 2008), and the histone  
79 acetyltransferase P300 has been proposed to be recruited at the promoter of specific  
80 endothelial genes by the ETS transcription factor ERG (ETS Related Gene) to control their  
81 expression both *in vivo* in zebrafish and in HUVEC (Human Umbilical Vein Endothelial Cell)  
82 (Fish et al., 2017; Kalna et al., 2019).

83 Given the common origin of blood and endothelial cells, and their partially shared  
84 transcriptional programs, it is plausible that known chromatin-modifying enzymes affecting  
85 hematopoiesis could also control blood vessel formation. Along this line, the epigenetic  
86 enzyme Prmt5 (Protein Arginine Methyltransferase 5) has been identified as a key player in  
87 blood cell formation (Liu et al., 2015a) but its impact on endothelial development has not been  
88 investigated to date. Prmt5 catalyzes the symmetric di-methylation of arginine residues on a  
89 variety of proteins including histones and therefore acts on many cellular processes such as  
90 genome organization, transcription, differentiation, cell cycle regulation or spliceosome  
91 assembly, among others (Blanc and Richard, 2017; Karkhanis et al., 2011; Stopa et al., 2015).  
92 Prmt5 is mainly known to repress transcription through the methylation of arginine residues on  
93 histones H3 and H4 and has been shown to regulate several differentiation processes such as  
94 myogenesis, oligodendrocyte and germ cell differentiation or hematopoiesis (Batut et al., 2011;  
95 Liu et al., 2015a; Shailesh et al., 2018; Zhu et al., 2019). In mice, *prmt5* knock out prevents  
96 pluripotent cells to form from the inner cell mass and is embryonic lethal (Tee et al., 2010).  
97 Conditional loss of *prmt5* in mice leads to severe anemia and pancytopenia and Prmt5  
98 maintains Hematopoietic Stem Cells (HSCs) and ensures proper blood cell progenitor  
99 expansion (Liu et al., 2015a). Loss of *prmt5* leads to oxidative DNA damages, increased cell  
100 apoptosis due to p53 dysregulation and as a consequence, to HSC exhaustion. In this context,

## PRMT5 promotes vascular morphogenesis

101 Prmt5 protects HSCs from DNA damages by allowing the splicing of genes involved in DNA  
102 repair (Tan et al., 2019).

103 Here, we explored the role of the Protein Arginine MethylTransferase Prmt5 during blood  
104 vessel formation and in hematopoiesis in zebrafish. Through the generation of a *prmt5* mutant,  
105 we highlight the key role of this gene during vascular morphogenesis *via* the control of  
106 expression of several ETS transcription factors and adhesion molecules. Moreover, we show  
107 that Prmt5 methyltransferase activity is not required for blood vessel formation and our results  
108 suggest that Prmt5 helps to shape correct chromatin conformation in endothelial cells.

109

## 110 RESULTS

### 111 *Prmt5 is required for HSC maintenance and lymphoid progenitor expansion*

112 To characterize *prmt5* function, we generated a *prmt5* mutant by targeting the second exon of  
113 *prmt5* with the CRISPR/Cas9 system. A deletion of 23 nucleotides was obtained, leading to a  
114 premature stop codon before the catalytic domain of Prmt5 (Fig. 1A). As a consequence,  
115 Prmt5, which was expressed ubiquitously in the trunk at 24 hours post fertilization (hpf), was  
116 no longer detected in the mutant (Fig. 1B, C). Similarly, Prmt5 expression was severely  
117 reduced in *prmt5* morpholino-injected embryos as compared to control morphants (Fig. S1 A,  
118 B) (Batut et al., 2011). In order to test whether Prmt5 regulates hematopoiesis in zebrafish,  
119 we took advantage of the transgenic line *Tg(gata2b:Gal4;UAS:lifectGFP)* that labels  
120 Hematopoietic Stem Cells (HSCs) (Butko et al., 2015). HSCs emerge from the ventral wall of  
121 the dorsal aorta (DA, Fig. 1D, D'), before migrating into the Caudal Hematopoietic Tissue  
122 (CHT) (Fig. 1D) where Hematopoietic Stem and Progenitor Cells (HSPCs) proliferate and  
123 undergo maturation (Butko et al., 2015). Reminiscent of the data published in mice (Liu et al.,  
124 2015a), the loss of *prmt5* led to an increased number of *gata2b*<sup>+</sup> HSCs in 36 hpf mutant  
125 embryos as compared to wild type ones (Fig. 1E-G). In addition, we found that the relative  
126 expression of *scla*, *runx1* or *cmyb*, which are specifically expressed in emerging HSCs, was

## PRMT5 promotes vascular morphogenesis

127 increased in *prmt5* mutant embryos as compared to wild type embryos (Fig. 1H). These results  
128 suggest that Prmt5 regulates the number of emerging HSCs from the dorsal aorta. We next  
129 investigated whether blood cell formation was impaired in *prmt5* zebrafish mutant as described  
130 in mouse (Liu et al., 2015a). HSPCs give rise to different blood cell progenitors, such as  
131 lymphoid progenitors which colonize the thymus leading to T lymphopoiesis (Fig. 1D) (Ma et  
132 al., 2013). As *gata2b*<sup>+</sup> lymphoid progenitors deriving from *gata2b*<sup>+</sup> HSCs can be detected in  
133 the thymus of transgenic zebrafish larvae from day 3 (Butko et al., 2015), we investigated  
134 whether Prmt5 could act on these progenitors. Indeed, we found that at 5 days, the number  
135 of *gata2b*<sup>+</sup> lymphoid progenitors in the thymus was significantly reduced in *prmt5* mutant and  
136 in morphant embryos as compared to wild type embryos (Fig. 1I-K, Fig. S1 C, D, G),  
137 suggesting that Prmt5 is required for lymphoid progenitor expansion. Altogether, these data  
138 indicate an important and conserved role of Prmt5 during hematopoiesis in zebrafish as in  
139 mouse.

### 140 ***Prmt5 is required for vascular morphogenesis***

141 As Prmt5 regulates zebrafish hematopoiesis, we next asked whether Prmt5 could also play a  
142 role during blood vessel formation, either during angiogenesis or vasculogenesis. First, we  
143 analyzed the expression and localization of Prmt5 by immunostaining in *Tg(fli1a:eGFP)*  
144 transgenic embryos, in which endothelial cells can be visualized with *egfp* (Lawson and  
145 Weinstein, 2002b). We found that Prmt5 was clearly expressed in early endothelial cells at 14  
146 somite stage (Fig. 2A-A"). At 24 hpf, Prmt5 was expressed in endothelial cells of the dorsal  
147 aorta (DA) and of the cardinal vein (CV) (Fig. 2B, B', D). Prmt5 was also detected in  
148 Intersegmental Vessels (ISVs) sprouting from the DA, in either the tip cell (leading the sprout)  
149 or the stalk cell (Fig. 2C, C', D). We then analyzed whether blood vessel formation was affected  
150 in transgenic *Tg(fli1a:eGFP) prmt5* mutants at 28 hpf. We found that the dorsal aorta diameter  
151 of mutant embryos was reduced as compared to the control (Fig. 2D, E, F close-ups),  
152 suggesting that lumen formation was perturbed. To confirm this result, we made use of the  
153 Notch reporter line *Tg(TP1bglob:VenusPEST)<sup>s940</sup>* in which only the dorsal aorta cells express

## PRMT5 promotes vascular morphogenesis

154 the transgene while the cardinal vein endothelial cells do not (Ninov et al., 2012; Quillien et al.,  
155 2014). In this transgenic context the area occupied by the dorsal aorta in *prmt5* morphant  
156 embryos was significantly reduced as compared to control embryos (Fig. 2G-I). *Prmt5* mutant  
157 embryos also showed a defect of sprouting ISV to reach the most dorsal part of the trunk and  
158 to connect with other ISVs and form the Dorsal Longitudinal Anastomotic Vessel (DLAV) (Fig.  
159 2D, E, F). This defect was associated with a significant reduction of ISV length (Fig. 2E, F, K)  
160 but with no impact on the number of endothelial cells (Fig. 2J). The observed size reduction of  
161 ISVs is thus most likely the result of an elongation issue rather than a proliferation defect. Of  
162 note, *prmt5* morphants reproduced the phenotype observed in *prmt5* mutants *i.e.* a reduced  
163 ISV length at 28 hpf (Fig. S2 A-D).

164 To get a better insight into the impact of Prmt5 on the dynamics of vascular system formation,  
165 we performed time-lapse analyses in control and *prmt5* morphant embryos. Time-lapse  
166 confocal movies were carried out from 28 hpf to 38 hpf to follow the elongation of ISVs to the  
167 formation of an effective lumen. As compared to control morphants, *prmt5* morphants showed  
168 an impaired formation of ISV lumen and DLAV. Indeed, *in prmt5* morphants tip cells failed to  
169 stay connected to the stalk cells and to contact other tip cells to allow the formation of the  
170 DLAV (Fig. 3A-B). Moreover, supernumerary connections were detected in the context of  
171 *prmt5*-loss of function (Fig. 3B). Altogether, these data suggest a central role for Prmt5 in  
172 vascular morphogenesis.

173 The master gene regulator ETV2, ETS transcription factors and adhesion proteins have been  
174 shown to be involved in blood vessel formation (Craig et al., 2015; Hultin et al., 2014; Pham et  
175 al., 2007; Sauter et al., 2017; Sauter et al., 2014). Analyzing single cell RNA-sequencing  
176 data from Wagner et al. (Wagner et al., 2018), allowed us to determine that *prmt5* is expressed  
177 in endothelial cells at 10 hpf (like *etv2* and *fli1a*) and that its expression decreases in later  
178 stages, when the expression of *fli1b*, *cdh5*, *agtr2*, *esama*, and *amotl2a* starts to increase (Fig.  
179 S3). To test whether Prmt5 could regulate the expression of these genes, we performed RT-  
180 qPCR experiments on mutant embryos and on their wild type counterparts. While we found

## PRMT5 promotes vascular morphogenesis

181 that *etv2* expression was not affected, the expression of ETS transcription factors (*fli1a*, *fli1b*)  
182 and adhesion proteins (*cdh5*, *agtr2*, *esama* and *amotl2a*), all putative ETV2 target genes (Liu  
183 et al., 2015b; Wong et al., 2009), was significantly reduced in *prmt5* mutant (Fig. 3C). Of note,  
184 we also detected a reduction of *fli1a* and *cdh5* expression in *prmt5* mutant by *in situ*  
185 hybridization (Fig. S4). As *etv2* expression was unaffected by the loss of *prmt5* but its targets  
186 were down-regulated, it is tempting to speculate that Prmt5 could modulate ETV2 activity at  
187 post-translational level.

### 188 ***Prmt5* methyltransferase activity is not required for vascular morphogenesis**

189 That Prmt5 modulates gene expression by methylating a variety of proteins including histones  
190 but also transcription (co)factors led us to test whether Prmt5 methyltransferase activity was  
191 required for vascular morphogenesis and lymphoid progenitor formation. To this end, *prmt5*  
192 mutant or morphant embryos were injected with wild type *human prmt5* mRNA (*hprmt5WT*) or  
193 with a catalytic mutant form of this mRNA (*hprmt5MUT*) (Pal et al., 2003). In mice, the  
194 expansion of lymphoid progenitor relies on Prmt5 methyltransferase activity (Liu et al., 2015a).  
195 Consistent with this, *hprmt5WT* but not *prmt5MUT* mRNA, was able to restore normal lymphoid  
196 progenitor expansion in *prmt5* morphant embryos (Fig. S1 C-G). This underscores the  
197 conserved requirement of PRMT5 methyltransferase activity for lymphoid progenitor formation  
198 in human and zebrafish. We then tested whether the same was true for ISV elongation and the  
199 expression of *etv2* target genes. Surprisingly, we found that both mRNAs were able to restore  
200 ISV elongation, albeit to a slightly different extend, as indicated by the average ISV length in  
201 injected mutant embryos as compared to non-injected mutants (Fig. 4A-E). Indeed, we  
202 observed that the average length of ISVs in *hprmt5WT*-injected mutants was even longer than  
203 intersegmental vessels of wild type embryos, while the average length in *hprmt5MUT* injected  
204 mutants was significantly superior to non-injected mutants but shorter than control embryos  
205 (Fig. 4 E). Interestingly, no difference could be seen in the cell number per ISV in the different  
206 contexts (Fig. 4F) thus ruling out the possibility that Prmt5 regulates cell proliferation at the  
207 ISV. Finally, RT-qPCR experiments revealed that both *hprmt5WT* and *hprmt5MUT* mRNAs



## PRMT5 promotes vascular morphogenesis

208 were able to restore the expression of *etv2* target genes, except for *fli1a* whose expression  
209 was only rescued by *hprmt5WT* (Fig. 4G). In sum, these results indicate that Prmt5  
210 methyltransferase activity is largely dispensable for its function in blood vessel formation.

### 211 ***Prmt5* might help to shape correct chromatin conformation in endothelial cells**

212 As Prmt5 methyltransferase activity seems to be not required for gene expression regulation  
213 in vascular morphogenesis, we speculated that Prmt5 could act as a scaffold protein in  
214 complexes mediating transcription and chromatin looping. Indeed, Prmt5 has been proposed  
215 to promote enhancer-promoter looping at the PPAR $\gamma$ 2 locus and more broadly to facilitate  
216 chromatin connection in adipocytes, *via* the recruitments of Mediator subunit MED1 and  
217 SWI/SNF chromatin remodeling complex subunit Brg1 ATPase (LeBlanc et al., 2016). Thus,  
218 we decided to inspect the chromatin architecture of the flanking region of identified Prmt5-  
219 regulated genes using ATAC-seq data from zebrafish endothelial cells that we previously  
220 generated (Quillien et al., 2017). Doing so, we found that putative enhancers are on average  
221 distant of 16 kb from the transcriptional start site (TSS) (Table S1, Figure S5), indicating that  
222 their expression could rely on proper chromatin looping. To further characterize these specific  
223 *cis* regulatory regions, we turned into the mouse model and analyzed the ChIP-seq data of  
224 Etv2 and Prmt5-dependent H4R3 di-methylation to determine whether Prmt5 target genes  
225 identified in our study were conserved in mouse (Girardot et al., 2014; Liu et al., 2015a). We  
226 found that Etv2 is recruited to the *cis* regulatory element of *amotl2*, *cdh5* and *fli1* (Table 1) and  
227 that its binding was associated with the presence of H4R3me2 for some of them, suggesting  
228 that ETV2 and Prmt5 can be recruited on the same regions in mouse. In order to gain further  
229 insight into the potential role of Prmt5 in supporting proper chromatin conformation in  
230 endothelial cells, we analyzed and compared the expression of *Gal4* reporter genes in an  
231 endogenous (Fig. 5A) and in an artificial chromatin context (Fig. 5E). The first construction  
232 used consists in the transgenic line *TgBAC(cdh5:GAL4FF);Tg(UAS:GFP)* that contains the  
233 sequence of an optimized version of Gal4VP16 (*GAL4FF*) inserted at the TSS of *cdh5* gene  
234 between *cdh5* promoter region (P) and a putative enhancer (E) distant of ~20kb as defined by

## PRMT5 promotes vascular morphogenesis

235 the presence of two ATAC-seq positive regions (Table S1, Fig. 5A, Fig. S5) (Busmann and  
236 Schulte-Merker, 2011; Quillien et al., 2017). Therefore, in double transgenic individuals, the  
237 level of GFP fluorescence intensity correlates with endogenous *cdh5* expression. In addition,  
238 we generated a transgenic line where the *cdh5* promoter and putative enhancer were cloned  
239 next to each other, both upstream of the *Gal4VP16* coding sequence (Fig. 5E). In double  
240 transgenic embryos *Tg(cdh5:Gal4VP16); Tg(UAS:KAEDE)*, the fluorescence intensity of the  
241 protein KAEDE is an artificial read out of *cdh5* transcription for which chromatin looping is not  
242 required. Comparing the level of fluorescence intensity in  
243 *TgBAC(cdh5:GAL4FF);Tg(UAS:GFP)* transgenic line in control condition and in the context of  
244 *prmt5* knock down, we observed a strong reduction of GFP fluorescence intensity in *prmt5*  
245 morphants (Fig. 5B-D), indicating that Prmt5 is required for *cdh5* expression in an endogenous  
246 context. In double transgenic embryos *Tg(cdh5:Gal4VP16); Tg(UAS:KAEDE)*, the fluorescent  
247 protein KAEDE was expressed in blood vessels (Fig. 5F), validating that the putative enhancer  
248 and the promoter region of *cdh5* are sufficient to drive gene expression in endothelial cells.  
249 However, in this artificial context, *prmt5* morpholino injection had no effect on the level of  
250 KAEDE fluorescence intensity as compared to control morphants (Fig. 5F-H). This result  
251 suggests that in this particular context *i.e.* when chromatin looping between enhancer and  
252 promoter was not needed, Prmt5 was not required either for gene expression. This finding  
253 supports the idea that Prmt5 plays a role in the formation of the correct 3D environment for  
254 endothelial genes expression. Finally, rescue experiments were performed by injecting either  
255 wild type or a catalytic mutant of human *prmt5* mRNA to determine whether Prmt5  
256 methyltransferase activity was required for the transcriptional control of *cdh5* expression in the  
257 endogenous context. We found that both wild type and mutant *hprmt5* mRNAs restored GFP  
258 fluorescence intensity in *prmt5* morphants as compared to control embryos (Fig. 5B-D, I-J).  
259 Collectively, these data indicate that the transcriptional control of *cdh5* is independent of Prmt5  
260 methyltransferase activity and could rather rely on a role of Prmt5 as a scaffold protein to  
261 provide a proper chromatin conformation context.

262

## PRMT5 promotes vascular morphogenesis

### 263 DISCUSSION

264 Here we have demonstrated a role for Prmt5 in both hematopoiesis and blood vessel formation  
265 in zebrafish. Our results suggest that Prmt5 promotes vascular morphogenesis through the  
266 transcriptional control of ETS transcription factor and adhesion proteins in endothelial cells.  
267 Intriguingly, we have shown that the methyltransferase activity of Prmt5 was not absolutely  
268 required to regulate gene expression, leading us to propose a role of scaffold protein for Prmt5  
269 to facilitate chromatin looping formation in endothelial cells.

270 We found that, similarly as in mouse (Liu et al., 2015a), Prmt5 plays an important role in  
271 zebrafish hematopoiesis by controlling HSCs emergence and HSPCs expansion. We also  
272 described for the first time the involvement of Prmt5 in vascular morphogenesis by regulating  
273 the expression of known genes that control this process (adhesion proteins or transcription  
274 factors). Actually, *prmt5* loss of function partially phenocopied loss of function of these genes.  
275 Indeed, it was shown that knocking down individual ETS proteins had limited effect on sprout  
276 formation, while the combination of morpholinos against both *fli1a*, *fli1b*, and *ets1* led to a  
277 decreased number of vessel sprouts at 24 hpf but to a normal trunk vasculature at 48 hpf  
278 (Pham et al., 2007). Moreover, *amolt2a* knock down in zebrafish led to a reduced diameter of  
279 the DA in a similar way as we found in the context of *prmt5* loss of function (Hultin et al., 2014).  
280 Furthermore, disconnected stalk and tip cells and delayed formation of the DLAV formation  
281 that we observed in *prmt5* mutant phenocopies loss of function of both *cdh5* and *esama*  
282 published in previous studies (Sauteur et al., 2017; Sauteur et al., 2014). However, the loss of  
283 function of *cdh5* had no effect on HSCs emergence or HSPCs expansion (Anderson et al.,  
284 2015), suggesting that Prmt5 might act on different set of genes in endothelial cells and in  
285 emerging HSCs. In agreement with this hypothesis, Tan et al. have proposed that Prmt5 is  
286 playing a critical role in HSC quiescence through the splicing of genes involved in DNA repair  
287 (Tan et al., 2019). Of note, this study showed that Prmt5 methyltransferase activity was  
288 required for controlling HSC quiescence, in agreement with our findings in the present work.  
289 In contrast, our data suggest that the methyltransferase activity of Prmt5 is dispensable in

## PRMT5 promotes vascular morphogenesis

290 endothelial cells, reinforcing the idea that Prmt5 regulates transcription by different  
291 mechanisms in these two processes (Fig. 6).

292 Prmt5 has been shown to facilitate ATP-dependent chromatin remodeling to promote gene  
293 expression in skeletal muscles and during adipocyte differentiation (Dacwag et al., 2009;  
294 LeBlanc et al., 2012; LeBlanc et al., 2016; Pal et al., 2003). Here, we propose that Prmt5 could  
295 also be essential for proper chromatin looping in endothelial cells. Our data suggest that Prmt5  
296 influences gene expression only in an endogenous context where chromatin looping is  
297 required (e.g. *chd5* and *TgBAC(cdh5:GAL4FF)*), while it is dispensable for gene expression  
298 when enhancer and promoter regions are artificially associated (e.g. *Tg(cdh5:Gal4VP16)*) or  
299 close by (e.g. *fli1a*). This implies that Prmt5 could interact with Brg1 ATPase of SWI/SNF  
300 chromatin remodeling complex and with the Mediator complex in endothelial cells as it does in  
301 muscle cells and adipocytes. Consistent with this hypothesis, *brg1* mutant mouse embryos  
302 display an anemia coupled to vascular defects in the yolk sac, characterized by thin vessels  
303 and supernumerary sprouts (Griffin et al., 2008), which is reminiscent to our present findings  
304 in zebrafish *prmt5* mutant. Interestingly, it has been proposed that the mediator complex  
305 regulates endothelial cell differentiation (Napoli et al., 2019). Moreover, our analyses of the  
306 published single cell expression data (Wagner et al., 2018) indicate that, similarly to *prmt5*, the  
307 expression of *smarc4a/brg1* and *med12* in zebrafish endothelial cells is detected as early as  
308 10 hpf and decreases in subsequent stages. It is thus tempting to speculate that Prmt5, Brg1  
309 and the Mediator could act together to regulate chromatin organization in endothelial cells (Fig.  
310 6).

311 ChIP-seq data available in mouse revealed that some flanking regions of orthologues of  
312 identified Prmt5 target genes are bound by ETV2 and present histone marks associated with  
313 the recruitment of Prmt5. In zebrafish, both *prmt5* and *etv2* genes are expressed at early stage  
314 in endothelial cells, and Etv2 binding motif is enriched in *cis*-regulatory regions identified by  
315 ATAC-seq experiment (Quillien et al., 2017). In addition, zebrafish mutant for *prmt5* from our  
316 study and a mutant for the master regulator *etv2* shared similarities in their phenotypes

## PRMT5 promotes vascular morphogenesis

317 displaying abnormal vasculature at 48 hpf characterized by a lack of lumen formation, a lack  
318 of vessel extension and aberrant connections (Craig et al., 2015; Pham et al., 2007). Here, we  
319 proposed that Etv2 could be involved in the recruitments of Prmt5 to *cis* regulatory regions of  
320 endothelial genes. Another crucial player of blood vessel formation is the transcription factor  
321 Npas4l, which is expressed during late gastrulation and regulates *etv2* expression (Marass et  
322 al., 2019). Npas4l ChIP-seq data and ATAC-seq data from *npas4l* mutant also revealed the  
323 binding of this transcription factor to a certain number of cis-regulatory regions of Prmt5 target  
324 genes identified in the present work. In light of these findings, we speculate that Npas4l could  
325 contribute to the recruitment of Prmt5 to endothelial genes (AQ and LV, unpublished data).  
326 Even though technically highly challenging at the present time, ChIP-seq against Prmt5 or any  
327 known Prmt5 substrates in endothelial cells in zebrafish combined with the corresponding  
328 RNA-seq/ATAC-seq experiments in wild type or mutant condition for Prmt5 could help to  
329 validate our model and identify all Prmt5 putative target genes.

330 The presence of Prmt5 and Brg1 at promotor regions of the *PPAR $\gamma$ 2* locus or of *myogenin* was  
331 associated with dimethylated H3R8 (histone 3 arginine 8) (Dacwag et al., 2009; LeBlanc et al.,  
332 2012). Interestingly, *prmt5* knock down led to a reduction of both histone methylation and  
333 chromatin looping formation (Dacwag et al., 2009; LeBlanc et al., 2012; LeBlanc et al., 2016).  
334 *In vitro*, the addition of Prmt5 to Brg1-immunopurified complexes enhanced histone  
335 methylation, while the addition of a catalytic dead version of Prmt5 did not (Pal et al., 2003).  
336 Altogether these data suggest that wild type Prmt5, when recruited to target gene promoter  
337 regions, acts most likely by dimethylating histone proteins. However, these studies did not  
338 assess the ability of Prmt5 to facilitate chromatin looping independently (or not) of its  
339 methyltransferase activity. Our data suggest that chromatin looping favored by Prmt5 does not  
340 necessarily require its methyltransferase activity. Indeed, rescue experiments demonstrated  
341 that Prmt5 was able to restore gene expression independently of its enzymatic activity, with  
342 the exception of *fli1a* expression. Since *fli1a* putative enhancer is located only at 700 pb from  
343 the promoter region, chromatin looping might not be required for *fli1a* expression and Prmt5

## PRMT5 promotes vascular morphogenesis

344 might essentially act here through its methyltransferase activity. Hence, depending on the  
345 context and the target genes considered, Prmt5 could modulate gene expression in endothelial  
346 cell through promotion of chromatin interaction and/or *via* histones/proteins modification.  
347 Finally, we can consider that other proteins of the PRMT family could also regulate endothelial  
348 gene expression, as some PRMT members are also expressed in zebrafish endothelial cells  
349 (AQ and LV, unpublished data). For instance, ChIP-seq data in chicken erythrocytes suggest  
350 that both Prmt5 and Prmt1 are recruited to the same cis-regulatory regions with Prmt1  
351 permitting the recruitments of CBP/p300 to acetylate histones (Beacon et al., 2020). Hence,  
352 analyses of the role(s) of other PRMT family members in endothelial cells would help to better  
353 understand the cross-talks between these enzymes. Besides their function during normal  
354 development, it has been shown in a zebrafish xenotransplantation model that Etv2 and Fli1b  
355 are required for tumor angiogenesis, suggesting that inhibition of these ETS factors may  
356 present a novel strategy to inhibit tumor angiogenesis and reduce tumor growth (Baltrunaite et  
357 al., 2017). We found that Prmt5 activates ETV2 target gene expression, and Prmt5 has been  
358 proposed as a therapeutic target in many diseases, including cancer (Shailesh et al., 2018).  
359 Several Prmt5 inhibitors have been discovered in the past decade and some have been tested  
360 in clinical trials for the treatment of tumors (reviewed in (Wang et al., 2018)). However, the vast  
361 majority, if not all, compounds discovered and validated so far inhibit Prmt5 enzymatic activity  
362 (Lin and Luengo, 2019). Yet, we show here that Prmt5 acts at least in part, independently of  
363 its methyltransferase activity to regulate vascular morphogenesis. Hence, our data shed light  
364 on a mechanism of action of Prmt5 that will be insensitive to the afore mentioned enzymatic  
365 inhibitors and thus calls forth the design of alternative drugs *i.e.* specific inhibitors of the  
366 interaction between Prmt5 and Etv2 in this context. In conclusion, our study highlights different  
367 modes of regulation of gene expression by Prmt5 in endothelial cells and strengthens the  
368 importance of its enzymatic-independent function in chromatin looping. This non-canonical  
369 function of Prmt5 may have a more pervasive role than previously thought in physiological  
370 conditions *i.e.* during development but also in pathological situations such as in tumor  
371 angiogenesis and this aspect certainly deserves more attention in the future.

## PRMT5 promotes vascular morphogenesis

372

### 373 MATERIALS AND METHODS

#### 374 Zebrafish care and maintenance

375 Embryos were raised and staged according to standard protocols and the Recommended  
376 Guidelines for Zebrafish Husbandry Conditions (Alestrom et al., 2019; Kimmel et al., 1995).  
377 The establishment and characterization of Tg(*gata2b*:Gal4;UAS:lifeactGFP), Tg(*fli1a*:eGFP),  
378 Tg(TP1b*glob*:VenusPEST)<sup>s940</sup>, TgBAC(*cdh5*:GAL4FF);Tg(UAS:GFP), Tg(UAS:KAEDE)  
379 have been described elsewhere (Bussmann and Schulte-Merker, 2011; Butko et al., 2015;  
380 Hatta et al., 2006; Lawson and Weinstein, 2002b; Ninov et al., 2012). Lines generated in this  
381 study are described below. Embryos were fixed overnight at 4°C in BT-FIX, after which they  
382 were immediately processed or dehydrated and stored at -20°C until use.

#### 383 Ethics statement

384 Fish were handled in a facility certified by the French Ministry of Agriculture (approval number  
385 A3155510). The project has received an agreement number APAFIS#7124-20161  
386 00517263944 v3. Anesthesia and euthanasia procedures were performed in Tricaine  
387 Methanesulfonate (MS222) solutions as recommended for zebrafish (0.16 mg/ml for  
388 anesthesia, 0.30 mg/ml for euthanasia). All efforts were made to minimize the number of  
389 animals used and their suffering, in accordance with the guidelines from the European directive  
390 on the protection of animals used for scientific purposes (2010/63/UE) and the guiding  
391 principles from the French Decret 2013–118.

#### 392 Plasmid construction

393 To construct the transgene Tg(*cdh5*:GAL4VP16), we cloned the putative *cdh5* promoter  
394 (*cdh5P*) and enhancer (*cdh5E*) elements into pme\_mcs and p5E\_GGWDest+ (Addgene  
395 #49319) (Kirchmaier et al., 2013; Kwan et al., 2007) using XhoI, EcoRI and BsaI to give  
396 pme\_ *cdh5P* and p5E\_ *cdh5E*, respectively. The Gal4VP16 sequence from pme\_Gal4VP16

## PRMT5 promotes vascular morphogenesis

397 (Kwan et al., 2007) was then introduced downstream of *cdh5P* into *pme\_cdh5P* using BamH1  
398 and SpeI. A multisite LR recombination reaction (Gateway LR Clonase II Enzyme mix,  
399 Invitrogen) was then performed using *p5E\_cdh5E*, *pme\_cdh5P:Gal4VP16*, with *pminTol-R4-*  
400 *R2pA* to give *pminTol- cdh5E-cdh5P: Gal4VP16*. Oligonucleotide sequences are listed in  
401 Table S2.

### 402 **Generation of *prmt5*<sup>-/-</sup> mutants by CRISPR/cas9**

403 The guide RNA (gRNA) was designed using CHOPCHOP CRISPR Design website (Montague  
404 et al., 2014). The designed oligos were annealed and ligated into the gRNA plasmid pDR274  
405 after digestion of the plasmid with BsaI (NEB). The gRNA was prepared *in vitro* using the  
406 MEGAshortscript T7 transcription kit (Ambion) after linearizing the plasmid with DraI (NEB)  
407 (Talbot and Amacher, 2014) before being purified using illustra MicroSpin G-50 Columns (GE  
408 Healthcare). 1 nL of a solution containing 10 $\mu$ M EnGen Cas9 NLS (NEB) and 100 ng/ $\mu$ l of  
409 gRNA was injected at the one-cell stage. WT, heterozygous, and homozygous *prmt5* animals  
410 were identified by PCR. Oligonucleotide sequences are listed in Table S2.

### 411 **Microinjections**

412 The *Tg(cdh5:GAL4VP16);Tg(UAS:KAEDE)* line was generated using *pminTol- cdh5E-cdh5P:*  
413 *Gal4VP16* by Tol2 transposition as described previously (Covassin et al., 2009). Control and  
414 *prmt5* morpholino oligonucleotides (MOs) were described previously (Batut et al., 2011).  
415 Embryos from in-crosses of the indicated heterozygous carriers or wild-type adults were  
416 injected at the one cell stage with 6 ng of MO. pBluescript II KS+ hPRMT5 WT and pBluescript  
417 II KS+ hPRMT5 Mutant (Pal et al., 2003) were linearized by EcoRI (NEB) and transcribed by  
418 T7 (Promega). 200 pg *hprmt5WT* mRNA, or *hprmt5 MUT* mRNA were injected at one cell  
419 stage.

### 420 **RNA extraction, Reverse transcription and real-time PCR**

421 Embryos were dissected at the indicated stage after addition of Tricaine Methanesulfonate.  
422 Genomic DNA was extracted from dissected embryo heads to identify their genotype and the



## PRMT5 promotes vascular morphogenesis

423 corresponding dissected tails were conserved in TRIzol Reagent at -20°C. After identification  
424 of wild type and mutant embryos, total RNAs from at least 6 identified tails were extracted  
425 following manufacturer's instructions (Invitrogen). Total RNAs were converted into cDNA using  
426 Prime Script cDNA Synthesis Kit (Takara) with Oligo(dT) and random hexamer primers for  
427 15 min at 37 °C according to manufacturer's instructions. cDNAs were then diluted 20-fold and  
428 quantified by qPCR using SsoFast Evagreen Supermix (Bio-rad) and specific primers. Data  
429 were acquired on CFX96 Real-Time PCR detection System (Bio-rad). Samples were analyzed  
430 in triplicates and the expression level was calculated relative to zebrafish housekeeping gene  
431 *EF1α*. Oligonucleotide sequences are listed in Table S2.

### 432 Live imaging

433 For the transgenic lines *TgBAC(cdh5:GAL4FF);Tg(UAS:GFP)* and  
434 *Tg(cdh5:GAL4VP16);Tg(UAS:KAEDE)*, embryos were placed in 1.5% low melt agarose with  
435 Tricaine on a glass-bottomed culture dish filled with egg water. Images were acquired using  
436 the confocal microscope TCS SP8 (Leica Microsystems) with an L 25 × /0.95 W FLUOSTAR  
437 VIZIR objective (zoom X1.25) using the scanner resonant mode. Confocal stacks were  
438 acquired every 10 min from 28 to 38 hpf to generate movies.

### 439 Immunostaining and *in situ* hybridization

440 After fixation or rehydration, embryos were washed twice with Phosphate Buffered Saline/1%  
441 Triton X-100 (PBST), permeabilized with PBST/0.5% Trypsin for 30 sec and washed twice  
442 again with PBST. After blocking with PBST/10% Fetal Calf Serum (FCS)/1% bovine serum  
443 albumin (BSA) (hereafter termed 'blocking solution') for at least 1 h, embryos were incubated  
444 with antibodies directed against either GFP (Torrey Pine, Biolabs), or Prmt5 (Upstate #07405),  
445 in blocking solution overnight at 4 °C followed by 5 washing steps with PBST. Embryos were  
446 then incubated with the appropriate Alexa Fluor-conjugated secondary antibodies (Molecular  
447 Probes) for at least 2 h at room temperature and washed three times. Nuclei were then stained  
448 with TO-PRO3 (Molecular Probes) and washed twice with PBST. Embryos were dissected,

## PRMT5 promotes vascular morphogenesis

449 flat-mounted in glycerol and images were recorded on a confocal microscope as above.  
450 Fluorescent *in situ* hybridization was carried out as previously described (Quillien et al., 2014).

### 451 **Image processing and measurements**

452 Confocal images and stacks were either analyzed with ImageJ software or LAS X. Nuclei of  
453 ISV cells and *gata2b*<sup>+</sup> cells were counted using the Multipoint tool of ImageJ. ISV lengths were  
454 measured by drawing a line between the base and the tip of ISV on ImageJ. Contours of the  
455 Dorsal Aorta were drawn using the Freehand Selection Tool with a digital pen and the area  
456 was then measured. Fluorescence intensity corresponded to the measurement of average  
457 gray value for each entire image.

### 458 **Statistical analysis**

459 Statistical comparisons of datasets were performed using GraphPad Prism software. For each  
460 dataset, we tested the assumption of normality with D'Agostino-Pearson tests and accordingly,  
461 unpaired t-test, Mann-Whitney test, One-way ANOVA, two-way ANOVA or Kruskal-Wallis test  
462 were used to compare dataset; means ( $\pm$  SEM) are indicated as horizontal bars on dot plots.  
463 The test used as well as the number of independent experiments performed and the minimal  
464 number of biological replicates are indicated in each figure legend.

### 465 **Bioinformatic analysis**

466 Published single cell data from total embryos at 10hpf, 14hpf, 18hpf and 24hpf (Wagner et al.,  
467 2018) were analyzed using the R package Seurat (Butler et al., 2018; Stuart et al., 2019). After  
468 data clustering, clusters of endothelial cells from each stage were identified by the expression  
469 of several endothelial specific genes (*etv2*, *fli1a*, ...). Then, we examined the level of  
470 expression and the percentage of cells expressing our gene of interest at each developmental  
471 stage. ATAC-seq data (Marass et al., 2019; Quillien et al., 2017) and Chip-seq data (Girardot  
472 et al., 2014; Liu et al., 2015a) were inspected using the Galaxy platform (Afgan et al., 2018).

473

## PRMT5 promotes vascular morphogenesis

### 474 **ACKNOWLEDGEMENTS**

475 We would like to thank the Blader lab for helpful discussions and support; Dr. Waltzer, Dr. Cau,  
476 Dr. Male and Dr. Navajas Acedo for critical reading of the manuscript; A. Laire for excellent  
477 zebrafish care; B. Ronsin and S. Bosch from the Toulouse Rio Imaging (TRI) platform; M.  
478 Aguirrebengoa from the BigA Core Facility, CBI Toulouse; Dr. Herbomel for the Zebrafish  
479 transgenic line *Tg(gata2b:Gal4;UAS:lifeactGFP)*. This work was supported by a grant from the  
480 Fondation de l'Association pour la Recherche contre le Cancer (Fondation ARC) and from the  
481 Association Française contre les Myopathies (AFM) to LV. AQ was supported by a fellowship  
482 from the Fondation ARC.

483

### 484 **COMPETING INTEREST**

485 The authors declare no competing interests.

486

### 487 **REFERENCES**

488 Afgan, E., Baker, D., Batut, B., van den Beek, M., Bouvier, D., Cech, M., Chilton, J., Clements,  
489 D., Coraor, N., Gruning, B.A., *et al.* (2018). The Galaxy platform for accessible, reproducible  
490 and collaborative biomedical analyses: 2018 update. *Nucleic Acids Res* 46, W537-W544.  
491 Alestrom, P., D'Angelo, L., Midtlyng, P.J., Schorderet, D.F., Schulte-Merker, S., Sohm, F., and  
492 Warner, S. (2019). Zebrafish: Housing and husbandry recommendations. *Lab Anim*,  
493 23677219869037.  
494 Anderson, H., Patch, T.C., Reddy, P.N., Hagedorn, E.J., Kim, P.G., Soltis, K.A., Chen, M.J.,  
495 Tamplin, O.J., Frye, M., MacLean, G.A., *et al.* (2015). Hematopoietic stem cells develop in the  
496 absence of endothelial cadherin 5 expression. *Blood* 126, 2811-2820.  
497 Baltrunaite, K., Craig, M.P., Palencia Desai, S., Chaturvedi, P., Pandey, R.N., Hegde, R.S.,  
498 and Sumanas, S. (2017). ETS transcription factors Etv2 and Fli1b are required for tumor  
499 angiogenesis. *Angiogenesis* 20, 307-323.  
500 Batut, J., Duboe, C., and Vandell, L. (2011). The methyltransferases PRMT4/CARM1 and  
501 PRMT5 control differentially myogenesis in zebrafish. *PLoS One* 6, e25427.

## PRMT5 promotes vascular morphogenesis

- 502 Beacon, T.H., Xu, W., and Davie, J.R. (2020). Genomic landscape of transcriptionally active  
503 histone arginine methylation marks, H3R2me2s and H4R3me2a, relative to nucleosome  
504 depleted regions. *Gene* 742, 144593.
- 505 Beis, D., and Stainier, D.Y. (2006). In vivo cell biology: following the zebrafish trend. *Trends*  
506 *Cell Biol* 16, 105-112.
- 507 Blanc, R.S., and Richard, S. (2017). Arginine Methylation: The Coming of Age. *Mol Cell* 65, 8-  
508 24.
- 509 Busmann, J., and Schulte-Merker, S. (2011). Rapid BAC selection for tol2-mediated  
510 transgenesis in zebrafish. *Development* 138, 4327-4332.
- 511 Butko, E., Distel, M., Pouget, C., Weijts, B., Kobayashi, I., Ng, K., Mosimann, C., Poulain, F.E.,  
512 McPherson, A., Ni, C.W., *et al.* (2015). *Gata2b* is a restricted early regulator of hemogenic  
513 endothelium in the zebrafish embryo. *Development* 142, 1050-1061.
- 514 Butler, A., Hoffman, P., Smibert, P., Papalexi, E., and Satija, R. (2018). Integrating single-cell  
515 transcriptomic data across different conditions, technologies, and species. *Nat Biotechnol* 36,  
516 411-420.
- 517 Covassin, L.D., Siekmann, A.F., Kacergis, M.C., Laver, E., Moore, J.C., Villefranc, J.A.,  
518 Weinstein, B.M., and Lawson, N.D. (2009). A genetic screen for vascular mutants in zebrafish  
519 reveals dynamic roles for *Vegf/Plcg1* signaling during artery development. *Dev Biol* 329, 212-  
520 226.
- 521 Craig, M.P., Grajevskaja, V., Liao, H.K., Balciuniene, J., Ekker, S.C., Park, J.S., Essner, J.J.,  
522 Balciunas, D., and Sumanas, S. (2015). *Etv2* and *fli1b* function together as key regulators of  
523 vasculogenesis and angiogenesis. *Arterioscler Thromb Vasc Biol* 35, 865-876.
- 524 Dacwag, C.S., Bedford, M.T., Sif, S., and Imbalzano, A.N. (2009). Distinct protein arginine  
525 methyltransferases promote ATP-dependent chromatin remodeling function at different stages  
526 of skeletal muscle differentiation. *Mol Cell Biol* 29, 1909-1921.
- 527 Fish, J.E., Cantu Gutierrez, M., Dang, L.T., Khyzha, N., Chen, Z., Veitch, S., Cheng, H.S.,  
528 Khor, M., Antounians, L., Njock, M.S., *et al.* (2017). Dynamic regulation of VEGF-inducible  
529 genes by an ERK/ERG/p300 transcriptional network. *Development* 144, 2428-2444.
- 530 Girardot, M., Hirasawa, R., Kacem, S., Fritsch, L., Pontis, J., Kota, S.K., Filipponi, D., Fabbrizio,  
531 E., Sardet, C., Lohmann, F., *et al.* (2014). PRMT5-mediated histone H4 arginine-3 symmetrical  
532 dimethylation marks chromatin at G + C-rich regions of the mouse genome. *Nucleic Acids Res*  
533 42, 235-248.
- 534 Griffin, C.T., Brennan, J., and Magnuson, T. (2008). The chromatin-remodeling enzyme BRG1  
535 plays an essential role in primitive erythropoiesis and vascular development. *Development*  
536 135, 493-500.
- 537 Hatta, K., Tsujii, H., and Omura, T. (2006). Cell tracking using a photoconvertible fluorescent  
538 protein. *Nat Protoc* 1, 960-967.

## PRMT5 promotes vascular morphogenesis

- 539 Hultin, S., Zheng, Y., Mojallal, M., Vertuani, S., Gentili, C., Bolland, M., Milloud, R., Belting,  
540 H.G., Affolter, M., Helker, C.S., *et al.* (2014). AmotL2 links VE-cadherin to contractile actin  
541 fibres necessary for aortic lumen expansion. *Nat Commun* 5, 3743.
- 542 Isogai, S., Horiguchi, M., and Weinstein, B.M. (2001). The vascular anatomy of the developing  
543 zebrafish: an atlas of embryonic and early larval development. *Dev Biol* 230, 278-301.
- 544 Kalna, V., Yang, Y., Peghaire, C.R., Frudd, K., Hannah, R., Shah, A.V., Osuna Almagro, L.,  
545 Boyle, J.J., Gottgens, B., Ferrer, J., *et al.* (2019). The Transcription Factor ERG Regulates  
546 Super-Enhancers Associated With an Endothelial-Specific Gene Expression Program. *Circ*  
547 *Res* 124, 1337-1349.
- 548 Karkhanis, V., Hu, Y.J., Baiocchi, R.A., Imbalzano, A.N., and Sif, S. (2011). Versatility of  
549 PRMT5-induced methylation in growth control and development. *Trends Biochem Sci* 36, 633-  
550 641.
- 551 Kimmel, C.B., Ballard, W.W., Kimmel, S.R., Ullmann, B., and Schilling, T.F. (1995). Stages of  
552 embryonic development of the zebrafish. *Dev Dyn* 203, 253-310.
- 553 Kirchmaier, S., Lust, K., and Wittbrodt, J. (2013). Golden GATEway cloning--a combinatorial  
554 approach to generate fusion and recombination constructs. *PLoS One* 8, e76117.
- 555 Kwan, K.M., Fujimoto, E., Grabher, C., Mangum, B.D., Hardy, M.E., Campbell, D.S., Parant,  
556 J.M., Yost, H.J., Kanki, J.P., and Chien, C.B. (2007). The Tol2kit: a multisite gateway-based  
557 construction kit for Tol2 transposon transgenesis constructs. *Dev Dyn* 236, 3088-3099.
- 558 Lawson, N.D., and Weinstein, B.M. (2002a). Arteries and veins: making a difference with  
559 zebrafish. *Nat Rev Genet* 3, 674-682.
- 560 Lawson, N.D., and Weinstein, B.M. (2002b). In vivo imaging of embryonic vascular  
561 development using transgenic zebrafish. *Dev Biol* 248, 307-318.
- 562 LeBlanc, S.E., Konda, S., Wu, Q., Hu, Y.J., Osowski, C.M., Sif, S., and Imbalzano, A.N.  
563 (2012). Protein arginine methyltransferase 5 (Prmt5) promotes gene expression of peroxisome  
564 proliferator-activated receptor gamma2 (PPARgamma2) and its target genes during  
565 adipogenesis. *Mol Endocrinol* 26, 583-597.
- 566 LeBlanc, S.E., Wu, Q., Lamba, P., Sif, S., and Imbalzano, A.N. (2016). Promoter-enhancer  
567 looping at the PPARgamma2 locus during adipogenic differentiation requires the Prmt5  
568 methyltransferase. *Nucleic Acids Res* 44, 5133-5147.
- 569 Lin, H., and Luengo, J.I. (2019). Nucleoside protein arginine methyltransferase 5 (PRMT5)  
570 inhibitors. *Bioorg Med Chem Lett* 29, 1264-1269.
- 571 Liu, F., Cheng, G., Hamard, P.J., Greenblatt, S., Wang, L., Man, N., Perna, F., Xu, H., Tadi,  
572 M., Luciani, L., *et al.* (2015a). Arginine methyltransferase PRMT5 is essential for sustaining  
573 normal adult hematopoiesis. *J Clin Invest* 125, 3532-3544.

## PRMT5 promotes vascular morphogenesis

- 574 Liu, F., Li, D., Yu, Y.Y., Kang, I., Cha, M.J., Kim, J.Y., Park, C., Watson, D.K., Wang, T., and  
575 Choi, K. (2015b). Induction of hematopoietic and endothelial cell program orchestrated by ETS  
576 transcription factor ER71/ETV2. *EMBO Rep* 16, 654-669.
- 577 Ma, D., Wei, Y., and Liu, F. (2013). Regulatory mechanisms of thymus and T cell development.  
578 *Dev Comp Immunol* 39, 91-102.
- 579 Marass, M., Beisaw, A., Gerri, C., Luzzani, F., Fukuda, N., Gunther, S., Kuenne, C.,  
580 Reischauer, S., and Stainier, D.Y.R. (2019). Genome-wide strategies reveal target genes of  
581 Npas4l associated with vascular development in zebrafish. *Development* 146.
- 582 Montague, T.G., Cruz, J.M., Gagnon, J.A., Church, G.M., and Valen, E. (2014). CHOPCHOP:  
583 a CRISPR/Cas9 and TALEN web tool for genome editing. *Nucleic Acids Res* 42, W401-407.
- 584 Napoli, C., Schiano, C., and Soricelli, A. (2019). Increasing evidence of pathogenic role of the  
585 Mediator (MED) complex in the development of cardiovascular diseases. *Biochimie* 165, 1-8.
- 586 Ninov, N., Borius, M., and Stainier, D.Y. (2012). Different levels of Notch signaling regulate  
587 quiescence, renewal and differentiation in pancreatic endocrine progenitors. *Development*  
588 139, 1557-1567.
- 589 Pal, S., Yun, R., Datta, A., Lacomis, L., Erdjument-Bromage, H., Kumar, J., Tempst, P., and  
590 Sif, S. (2003). mSin3A/histone deacetylase 2- and PRMT5-containing Brg1 complex is  
591 involved in transcriptional repression of the Myc target gene cad. *Mol Cell Biol* 23, 7475-7487.
- 592 Pham, V.N., Lawson, N.D., Mugford, J.W., Dye, L., Castranova, D., Lo, B., and Weinstein,  
593 B.M. (2007). Combinatorial function of ETS transcription factors in the developing vasculature.  
594 *Dev Biol* 303, 772-783.
- 595 Quillien, A., Abdalla, M., Yu, J., Ou, J., Zhu, L.J., and Lawson, N.D. (2017). Robust  
596 Identification of Developmentally Active Endothelial Enhancers in Zebrafish Using FANS-  
597 Assisted ATAC-Seq. *Cell Rep* 20, 709-720.
- 598 Quillien, A., Moore, J.C., Shin, M., Siekmann, A.F., Smith, T., Pan, L., Moens, C.B., Parsons,  
599 M.J., and Lawson, N.D. (2014). Distinct Notch signaling outputs pattern the developing arterial  
600 system. *Development* 141, 1544-1552.
- 601 Rosa-Garrido, M., Chapski, D.J., and Vondriska, T.M. (2018). Epigenomes in Cardiovascular  
602 Disease. *Circ Res* 122, 1586-1607.
- 603 Sauter, L., Affolter, M., and Belting, H.G. (2017). Distinct and redundant functions of Esam  
604 and VE-cadherin during vascular morphogenesis. *Development* 144, 1554-1565.
- 605 Sauter, L., Krudewig, A., Herwig, L., Ehrenfeuchter, N., Lenard, A., Affolter, M., and Belting,  
606 H.G. (2014). Cdh5/VE-cadherin promotes endothelial cell interface elongation via cortical actin  
607 polymerization during angiogenic sprouting. *Cell Rep* 9, 504-513.
- 608 Shailesh, H., Zakaria, Z.Z., Baiocchi, R., and Sif, S. (2018). Protein arginine methyltransferase  
609 5 (PRMT5) dysregulation in cancer. *Oncotarget* 9, 36705-36718.

## PRMT5 promotes vascular morphogenesis

- 610 Stopa, N., Krebs, J.E., and Shechter, D. (2015). The PRMT5 arginine methyltransferase: many  
611 roles in development, cancer and beyond. *Cell Mol Life Sci* 72, 2041-2059.
- 612 Stuart, T., Butler, A., Hoffman, P., Hafemeister, C., Papalexi, E., Mauck, W.M., 3rd, Hao, Y.,  
613 Stoeckius, M., Smibert, P., and Satija, R. (2019). Comprehensive Integration of Single-Cell  
614 Data. *Cell* 177, 1888-1902 e1821.
- 615 Talbot, J.C., and Amacher, S.L. (2014). A streamlined CRISPR pipeline to reliably generate  
616 zebrafish frameshifting alleles. *Zebrafish* 11, 583-585.
- 617 Tan, D.Q., Li, Y., Yang, C., Li, J., Tan, S.H., Chin, D.W.L., Nakamura-Ishizu, A., Yang, H., and  
618 Suda, T. (2019). PRMT5 Modulates Splicing for Genome Integrity and Preserves Proteostasis  
619 of Hematopoietic Stem Cells. *Cell Rep* 26, 2316-2328 e2316.
- 620 Tee, W.W., Pardo, M., Theunissen, T.W., Yu, L., Choudhary, J.S., Hajkova, P., and Surani,  
621 M.A. (2010). Prmt5 is essential for early mouse development and acts in the cytoplasm to  
622 maintain ES cell pluripotency. *Genes Dev* 24, 2772-2777.
- 623 Thisse, C., and Zon, L.I. (2002). Organogenesis--heart and blood formation from the zebrafish  
624 point of view. *Science* 295, 457-462.
- 625 Wagner, D.E., Weinreb, C., Collins, Z.M., Briggs, J.A., Megason, S.G., and Klein, A.M. (2018).  
626 Single-cell mapping of gene expression landscapes and lineage in the zebrafish embryo.  
627 *Science* 360, 981-987.
- 628 Wang, Y., Hu, W., and Yuan, Y. (2018). Protein Arginine Methyltransferase 5 (PRMT5) as an  
629 Anticancer Target and Its Inhibitor Discovery. *J Med Chem* 61, 9429-9441.
- 630 Wong, K.S., Proulx, K., Rost, M.S., and Sumanas, S. (2009). Identification of vasculature-  
631 specific genes by microarray analysis of *Etsrp/Etv2* overexpressing zebrafish embryos. *Dev*  
632 *Dyn* 238, 1836-1850.
- 633 Zhu, J., Zhang, D., Liu, X., Yu, G., Cai, X., Xu, C., Rong, F., Ouyang, G., Wang, J., and Xiao,  
634 W. (2019). Zebrafish *prmt5* arginine methyltransferase is essential for germ cell development.  
635 *Development* 146.

636

### 637 **FIGURE LEGENDS**

638 **Figure 1: Loss of *prmt5* affect HSCs and HSPCs production.** **A-** Schematic representation  
639 of the sequence targeted by CRISPR/Cas9 leading to a 23 nucleotides deletion, and of wild  
640 type and truncated Prmt5 proteins. The catalytic domain "CAT" appears in magenta. **B-C-**  
641 Confocal sections of immunostaining with anti-Prmt5 antibody of wild type and *prmt5* mutant  
642 embryos at 24 hpf. Scale bar 100  $\mu$ m. **D-** Schematic representation of vascular (green) and

## PRMT5 promotes vascular morphogenesis

643 hematopoietic (red) systems in a zebrafish larva. Circle and bracket indicate the Thymus (T)  
644 and the Caudal Hematopoietic Tissue (CHT), respectively. **D'**- Close-up of the trunk  
645 vasculature where HSCs emerge from the ventral wall of the dorsal aorta (DA), bud and  
646 migrate. Red line represents the diameter of the dorsal aorta. Cardinal Vein (CV). **E-F'**-  
647 Confocal section of transgenic *Tg(gata2b:Gal4; UAS:lifeactGFP)* embryos at 36 hpf showing  
648 *gata2b*<sup>+</sup> cells in red and TO-PRO-3 in black. Blue arrows indicate HSCs labelled in red in wild  
649 type (**E, E'**) and in *prmt5* mutant (**F, F'**) embryos. Bar scale 100  $\mu$ m. **G**- Average number of  
650 HSCs enumerated per confocal stack in wild type and in *prmt5* mutant embryos at 36 hpf. Data  
651 are from 3 independent experiments with at least 6 individuals per experiment and a Mann-  
652 Whitney test was performed. **H**- Relative mRNA expressions determined by RT-qPCR in 36  
653 hpf wild type and *prmt5* mutant embryos, from 3 independent experiments with at least 6  
654 animals per condition. Two-way ANOVA was performed. **I-J**- Confocal sections of wild type (**I**)  
655 and *prmt5* mutant (**J**) thymus from transgenic *Tg(gata2b:Gal4; UAS:lifeactGFP)* embryos at 5  
656 days. Thymus are delimited by a white circle. Bar scale 100  $\mu$ m. **K**- Average number of HSPCs  
657 enumerated per confocal stack in wild type and *prmt5* mutant embryos at 5 days from 3  
658 independent experiments with at least 5 individuals per analysis. T-test was performed. \*  
659  $P < 0.05$ , \*\*  $P < 0.01$ , \*\*\* $P < 0.001$ .

660 **Figure 2: Loss of *prmt5* impairs blood vessel formation.** **A-C'**- Confocal projections of  
661 transgenic *Tg(fli1a:GFP)<sup>y1</sup>* embryos with endothelial cells (in green) after immunostaining  
662 against Prmt5 (in magenta). **A-A''**- Dorsal view of the lateral plate mesoderm at 14 somite-  
663 stage. Yellow rectangle delimits the close up of Prmt5<sup>+</sup> endothelial cells (**A'-A''**). Prmt5<sup>+</sup> cells  
664 appear in magenta (**A-A''**) and endothelial cells in green (**A-A'**). Anterior is on top. Scale bars  
665 100  $\mu$ m (**A**) and 25  $\mu$ m (**A'**). **B-B'**- Confocal projections focusing on endothelial cells (in green)  
666 from the dorsal aorta (DA) and the cardinal vein (CV) at 24 hpf. Red and blue arrows point to  
667 Prmt5<sup>+</sup> cells (in magenta) from the DA and the CV, respectively. Red and blue lines represent  
668 DA and CV diameters, respectively. Scale bar 50  $\mu$ m. **C-C'**- Confocal projections focusing on  
669 sprouting ISVs (in green) at 24 hpf. Light blue and yellow arrows point to tip and stalk cell,



## PRMT5 promotes vascular morphogenesis

670 respectively. **D-** Schematic representation of the trunk vasculature with ISVs sprouting from  
671 the DA. The tip cell leads the cell migration and the stalk cell maintains the connection with the  
672 DA. **E-F-** Confocal projections of transgenic *Tg(fli1a:GFP)<sup>y1</sup>* wild type (**E**) and *prmt5* mutant (**F**)  
673 embryos at 28 hpf. Red rectangles delimit where DA close ups were made. White rectangles  
674 delimit the higher magnification (x2) of the DA with red lines indicating the dorsal aorta  
675 diameters. White arrows indicate the connection point between two ISVs to form the Dorsal  
676 Longitudinal Anastomotic Vessel (DLAV). Scale bar 100  $\mu\text{m}$ . **G-H-** Confocal projections of  
677 control morphant (**G**) and *prmt5* morphant (**H**) transgenic *Tg(TP1bglob:VenusPEST)<sup>s940</sup>*  
678 embryos labelling cells from the DA at 28 hpf. Yellow lines delimit the measured area occupied  
679 by the DA. Scale bar 25  $\mu\text{m}$  **I-** Average area occupied by the DA in  $\mu\text{m}^2$  in control and *prmt5*  
680 morpholino injected embryos from 2 independent experiments with at least 8 animals per  
681 condition. T-test was performed. **J-K-** Average number of endothelial cells per intersegmental  
682 vessel (**J**) and average ISV length in  $\mu\text{m}$  (**K**) in control and in *prmt5* mutant embryos from 3  
683 independent experiments with at least 3 animals per condition. T-test and Mann Whitney test  
684 were performed, respectively. \*\*  $P < 0.01$ , \*\*\* $P < 0.001$ .

685 **Figure 3: Prmt5 is required for vascular morphogenesis. A-B-** Still images from movies of  
686 control (**A**) and *prmt5* morphant (**B**) *Tg(fli1a:GFP)<sup>y1</sup>* transgenic embryos from 28 to 38 hpf. Red  
687 asterisks label missing connections between tip and stalk cells as well as missing connections  
688 between tip cells that should lead to DLAV formation. Red arrows point to connecting ISVs  
689 leading to DLAV formation. White arrows indicate supernumerary sprouts. Yellow asterisks  
690 label the lumen of ISVs. Scale bar 50  $\mu\text{m}$ . **C-** Relative mRNA expressions of the indicated  
691 transcripts were determined by RT-qPCR in 28 hpf wild type and *prmt5* mutant embryos, from  
692 3 independent experiments with at least 6 animals per condition. Two-way ANOVA was  
693 performed. \*  $P < 0.05$ , \*\*\* $P < 0.001$ .

694 **Figure 4: Prmt5 methyltransferase activity is dispensable for vascular morphogenesis.**  
695 **A-D-** Confocal projections of transgenic *Tg(fli1a:GFP)<sup>y1</sup>* embryos at 28 hpf. Wild type embryo  
696 is on the top left panel (**A**), *prmt5* mutant embryos were not injected (**B**) or injected with either

## PRMT5 promotes vascular morphogenesis

697 *hprmt5WT* mRNA (**C**) or the mutant form *hprmt5MUT* mRNA (**D**). Scale bar 100  $\mu$ m. **E-F-**  
698 Average ISVs length in  $\mu$ m (**E**) and average number of endothelial cells per ISVs (**F**) for wild  
699 type, *prmt5* mutant embryos not injected or injected with *hprmt5WT* mRNA, or *hprmt5 MUT*  
700 mRNA, from 3 independent experiments with at least 3 animals per condition. Kruskal-Wallis  
701 test (**E**) and One-way ANOVA (**F**) were performed. \*\* P<0.01, \*\*\* P<0.001. **G-** Relative mRNA  
702 expressions were determined by RT-qPCR on 28 hpf wild type and *prmt5* mutant embryos  
703 injected by either *hprmt5WT* or *hprmt5MUT* mRNAs, from 2 independent experiments with at  
704 least 6 animals per condition. Two-way ANOVA was performed. \* P<0.05.

705 **Figure 5: Prmt5 promotes chromatin looping.** **A-** Schematic representation of the transgene  
706 *TgBAC(cdh5:GAL4FF)* containing two putative cis-regulatory elements, a promotor region (P)  
707 and an enhancer (E), separated by ~20kb with the *GAL4FF* reporter gene inserted at the TSS  
708 of *cdh5*. **B, C, I, J-** Confocal projections of transgenic *TgBAC(cdh5:GAL4FF);Tg(UAS:GFP)*  
709 embryos at 28 hpf. Control morphant is on the top left panel (**B**), *prmt5* morphant embryos  
710 were not injected (**C**) or injected by either *hprmt5WT* mRNA (**I**) or the catalytic mutant form  
711 *hprmt5MUT* (**J**) mRNA. The fluorescent intensity is colored-coded, from the Low intensity (L)  
712 in black to High intensity (H) in white (intensity scale as in panel **B**). Scale bar 100  $\mu$ m. **D-**  
713 Average GFP fluorescence intensity per confocal projection for control, *prmt5* morphant  
714 embryos injected by *hprmt5WT* mRNA, or *hprmt5 MUT* mRNA or not injected, from 3  
715 independent experiments with at least 3 animals per condition. One-way ANOVA was  
716 performed. \*P<0.05, \*\*\*P<0.001. **E-** Schematic representation of the transgene  
717 *Tg(cdh5:GAL4VP16)* containing the two putative cis-regulatory elements next to each other (E  
718 and P), upstream of *GAL4VP16* reporter gene. **F-G-** Confocal projection of transgenic  
719 *Tg(cdh5:GAL4VP16);Tg(UAS:KAEDE)* embryos at 26 hpf injected with either a control  
720 morpholino (**F**) or a *prmt5* morpholino (**G**). The fluorescence intensity is color- coded, from the  
721 Low intensity (L) in black to High intensity (H) in white (intensity scale in panel **B**). **H-** Average  
722 KAEDE fluorescence intensity for control and for *prmt5* morphant embryos, from 3 independent  
723 experiments with at least 5 animals per condition. T-test was performed.

## PRMT5 promotes vascular morphogenesis

724 **Figure 6: A-** Schematic representation of two distinct roles of Prmt5 during the formation of  
725 hematopoietic lineage development and blood vessels, relying or not on its methyltransferase  
726 activity, respectively. **B-** Proposed model to depict the function of Prmt5 in zebrafish endothelial  
727 cells. The transcription factor ETV2 recruited to promoters and enhancers of endothelial  
728 specific genes, could favor the recruitment of a complex including Prmt5, Brg1 and the  
729 mediator complex to help the formation of chromatin looping and thus facilitate the transcription  
730 of specific endothelial genes. Dashed lines indicate potential interactions or plausible  
731 recruitments of Brg1 and/or the mediator complex.

732 **Figure S1: A-B-** Confocal sections of Prmt5 immunostaining in control and *prmt5* morphant  
733 embryos at 24 hpf. Scale bar 100  $\mu$ m. **C-F-** Confocal sections of thymus from transgenic  
734 Tg(*gata2b:Gal4; UAS:lifectGFP*) embryos at 3 days. Transgenic embryos were injected by  
735 control morpholino (**C**) or *prmt5* morpholino only (**D**) or in combination *hprmt5WT* mRNA (**E**)  
736 or the catalytic mutant form *hprmt5MUT* mRNA (**F**). Thymus is delimited by a white circle. Bar  
737 scale 100  $\mu$ m. **G-** Average number of HSPCs enumerated per confocal stack in injected  
738 embryos at 3 days from 2 independent experiments with at least 3 individuals per analysis. T-  
739 test was performed. \*\*\*P<0.001.

740 **Figure S2: A-B-** Confocal projections of transgenic Tg(*fli1a:GFP*)<sup>y1</sup> embryos injected by either  
741 control morpholino (**A**) or *prmt5* morpholino (**B**). Scale bar 100  $\mu$ m. **C-D-** Average number of  
742 endothelial cells per ISV (**C**) and average ISV length in  $\mu$ m (**D**), in control and *prmt5* morphant  
743 embryos, from 3 independent experiments with at least 4 animals per condition. T-test and  
744 Mann-Whitney test were performed. \*\*\* P<0.001.

745 **Figure S3:** Expression heatmap for *prmt5*, *etv2* and identified Prmt5 target genes, for  
746 endothelial cells at 10hpf, 14hpf, 18hpf and 24hpf. The expression level is colored-coded from  
747 absence of expression (in green) to highest level of expression (in white).

748 **Figure S4: A-D-** Confocal projections of wild type (**A, C**) and *prmt5* mutant embryos (**B, D**)  
749 after fluorescent *in situ* hybridization against *fli1a* (**A-B**) and *cdh5* (**C-D**). Scale bar 100  $\mu$ m. **E-**

## PRMT5 promotes vascular morphogenesis

750 **F-** Percentage of embryos (y axis) presenting a high or a low level of expression of *fli1a* (**E**) or  
751 *cdh5* (**F**), according to their genotype (x axis), from 3 independent experiments with at least 4  
752 animals per condition.

753 **Figure S5:** Chromatin profile visualization of endothelial cells from the UCSC Genome  
754 Browser. ATAC-seq peaks as determined by Quillien et al. (Quillien et al., 2017) flanking  
755 indicated genes (*cdh5*, *esama*, *agtr2*, *fli1a*, *fli1b*, *amotl2a*). Promoter regions (P) and  
756 numerated putative enhancers (corresponding numerated peaks are found in Table S1) are  
757 highlighted in light orange and light purple, respectively.

figure1

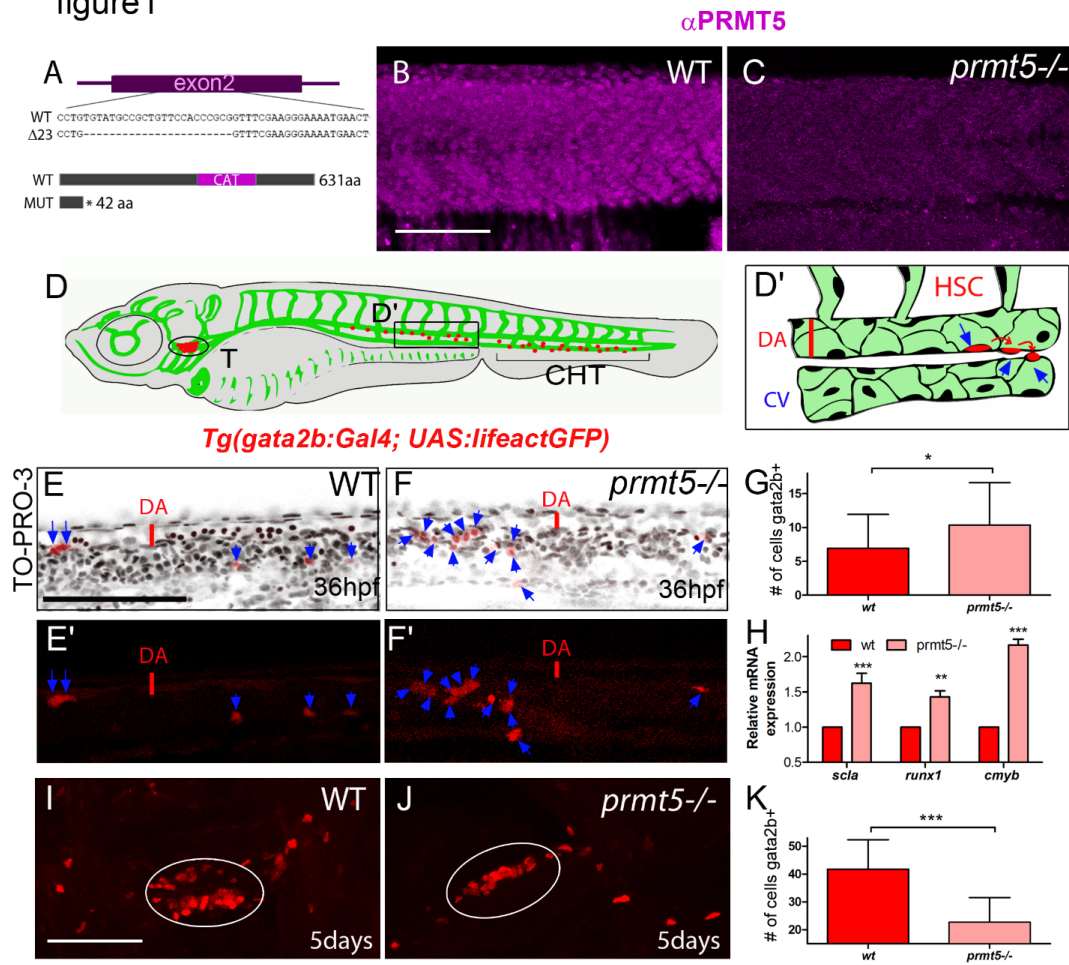

figure2

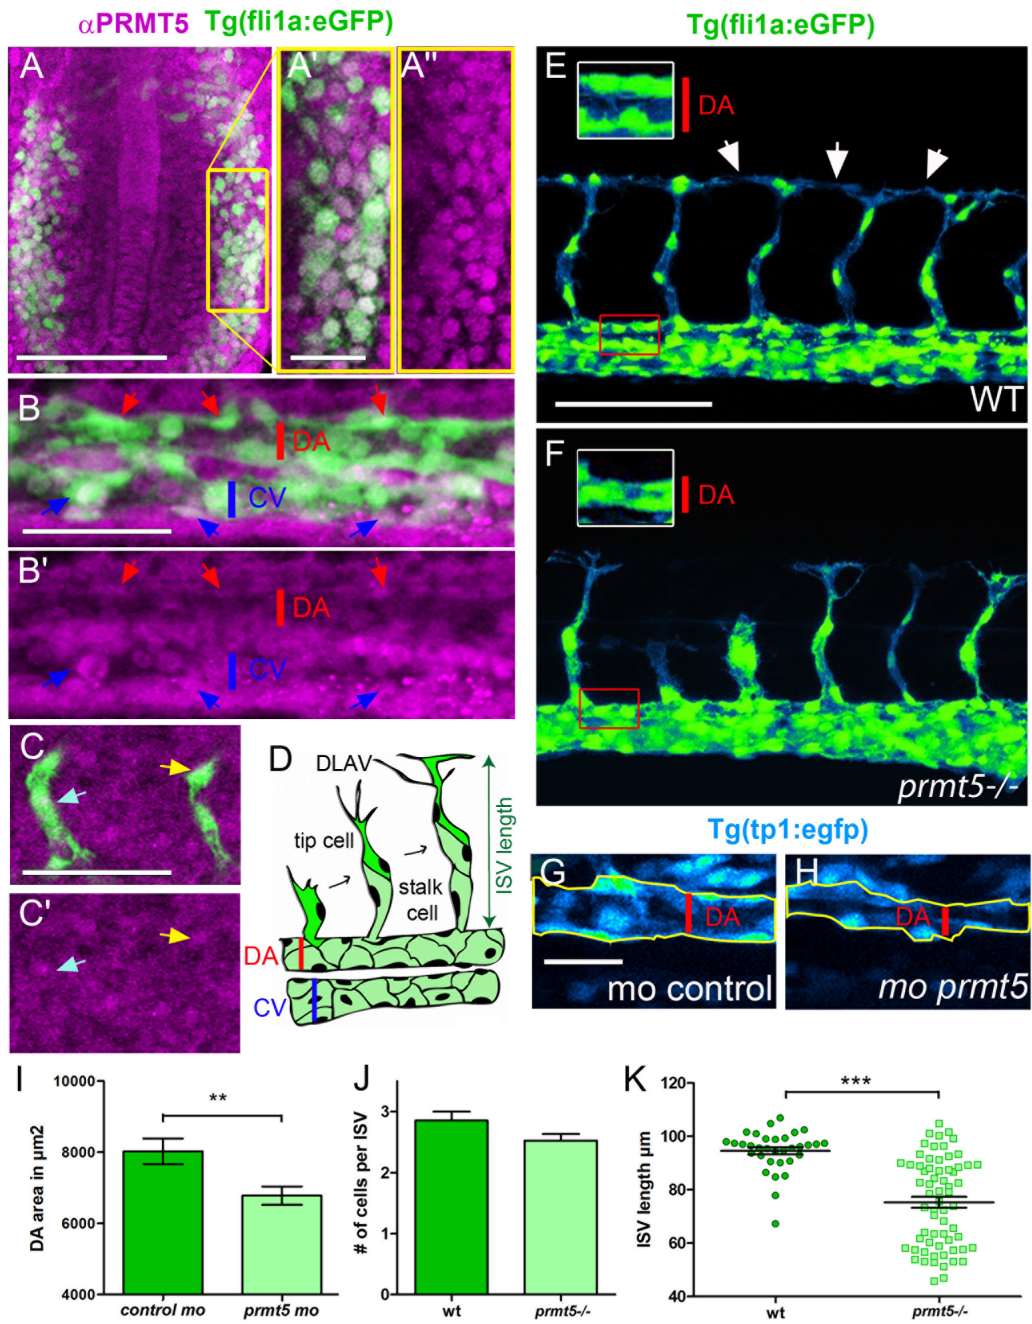

figure3

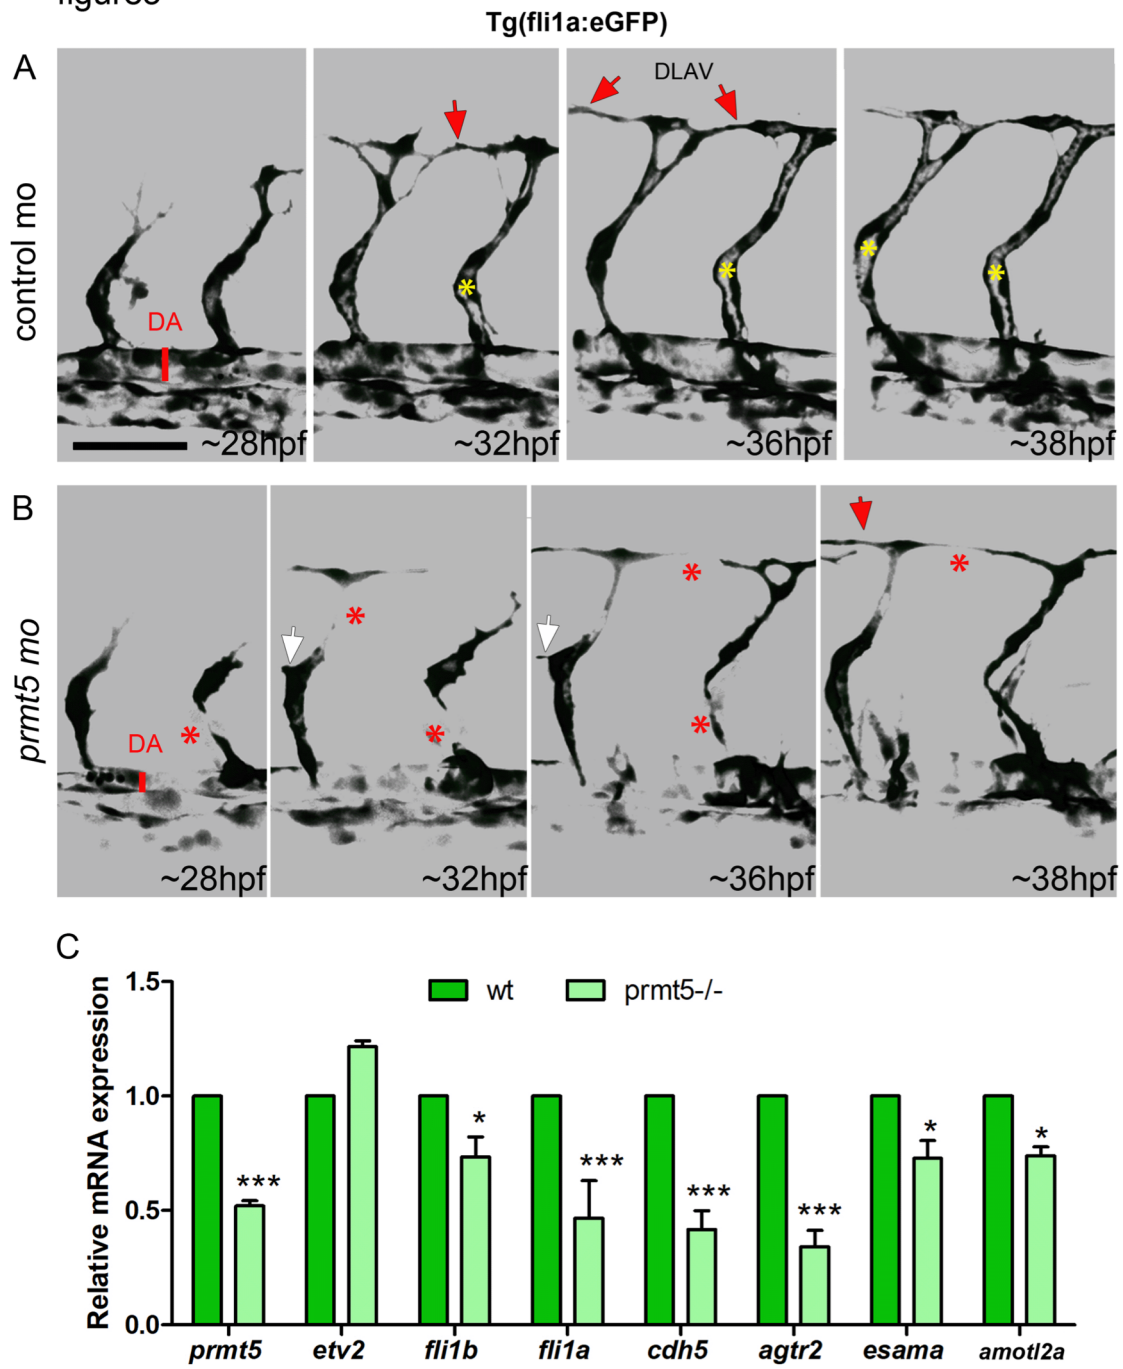

figure4

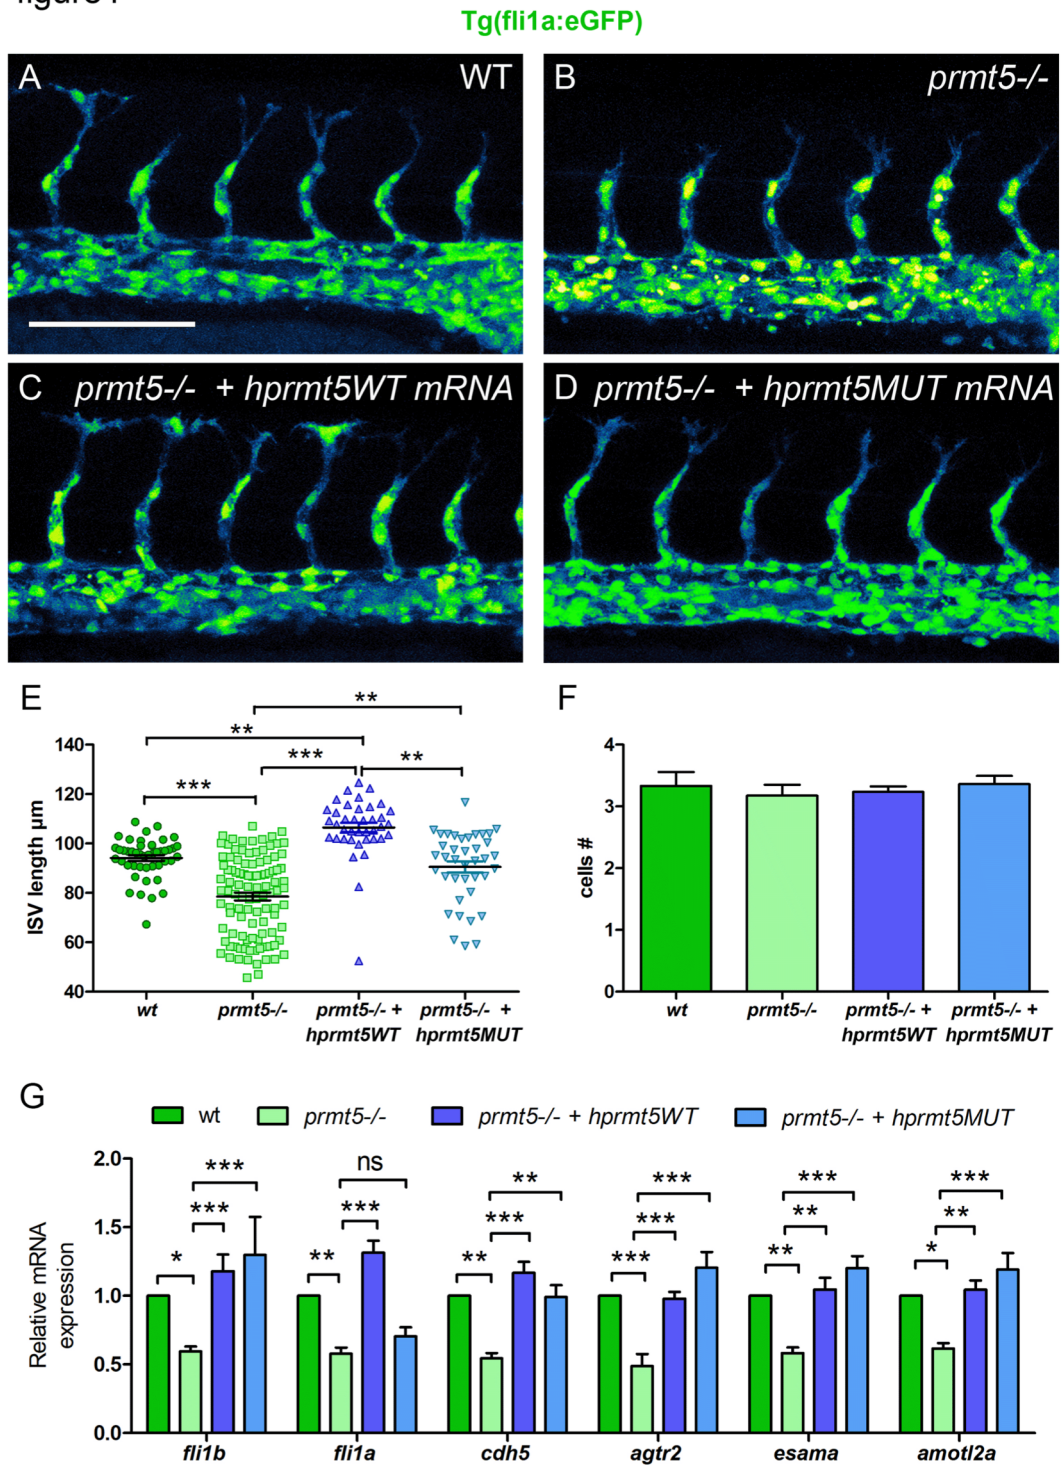



| Gene symbol   | Peak chr    | Peak start  | Peak stop   | ETV2 CHIP Peak in mouse embryo | H4R3me2s CHIP Peak in MEF mouse cells |
|---------------|-------------|-------------|-------------|--------------------------------|---------------------------------------|
| <i>amotl2</i> | <i>chr9</i> | 102,611,688 | 102,612,810 | <i>yes</i>                     | <i>yes</i>                            |
| <i>amotl2</i> | <i>chr9</i> | 102,624,400 | 102,624,850 | <i>yes</i>                     | <i>no</i>                             |
| <i>cdh5</i>   | <i>chr8</i> | 106,619,166 | 106,620,059 | <i>yes</i>                     | <i>yes</i>                            |
| <i>cdh5</i>   | <i>chr8</i> | 106,623,076 | 106,623,670 | <i>yes</i>                     | <i>yes</i>                            |
| <i>cdh5</i>   | <i>chr8</i> | 106,625,171 | 106,625,699 | <i>yes</i>                     | <i>yes</i>                            |
| <i>fli1</i>   | <i>chr9</i> | 32,389,460  | 32,390,252  | <i>yes</i>                     | <i>no</i>                             |
| <i>fli1</i>   | <i>chr9</i> | 32,378,074  | 32,378,681  | <i>yes</i>                     | <i>no</i>                             |
| <i>fli1</i>   | <i>chr9</i> | 32,363,839  | 32,364,366  | <i>yes</i>                     | <i>yes</i>                            |
| <i>fli1</i>   | <i>chr9</i> | 32,348,223  | 32,349,647  | <i>yes</i>                     | <i>yes</i>                            |
| <i>agtr2</i>  | <i>chrX</i> | –           | –           | <i>no</i>                      | <i>yes</i>                            |

**Table 1: Chromatin profile of mouse orthologous genes of *prmt5* identified target genes.**

List of Etv2 and H4R3me2s peaks identified by CHIP-seq in mouse embryos and in MEF mouse cells, respectively (Liu et al., 2015a; Girardot et al., 2014).

figure5

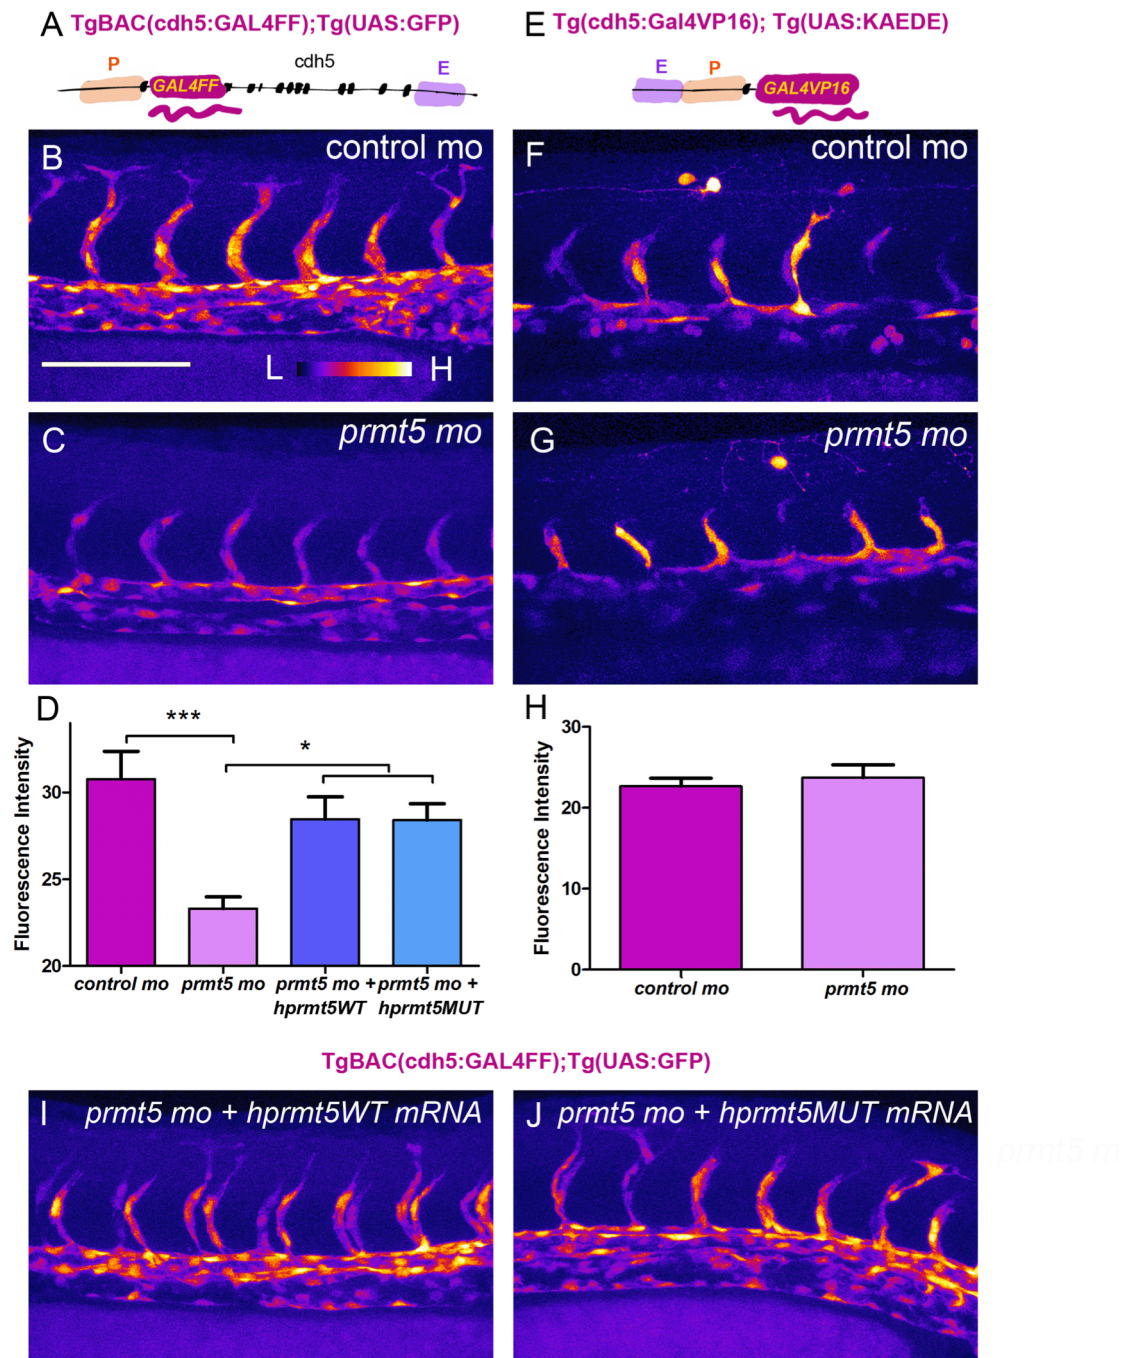

figure 6

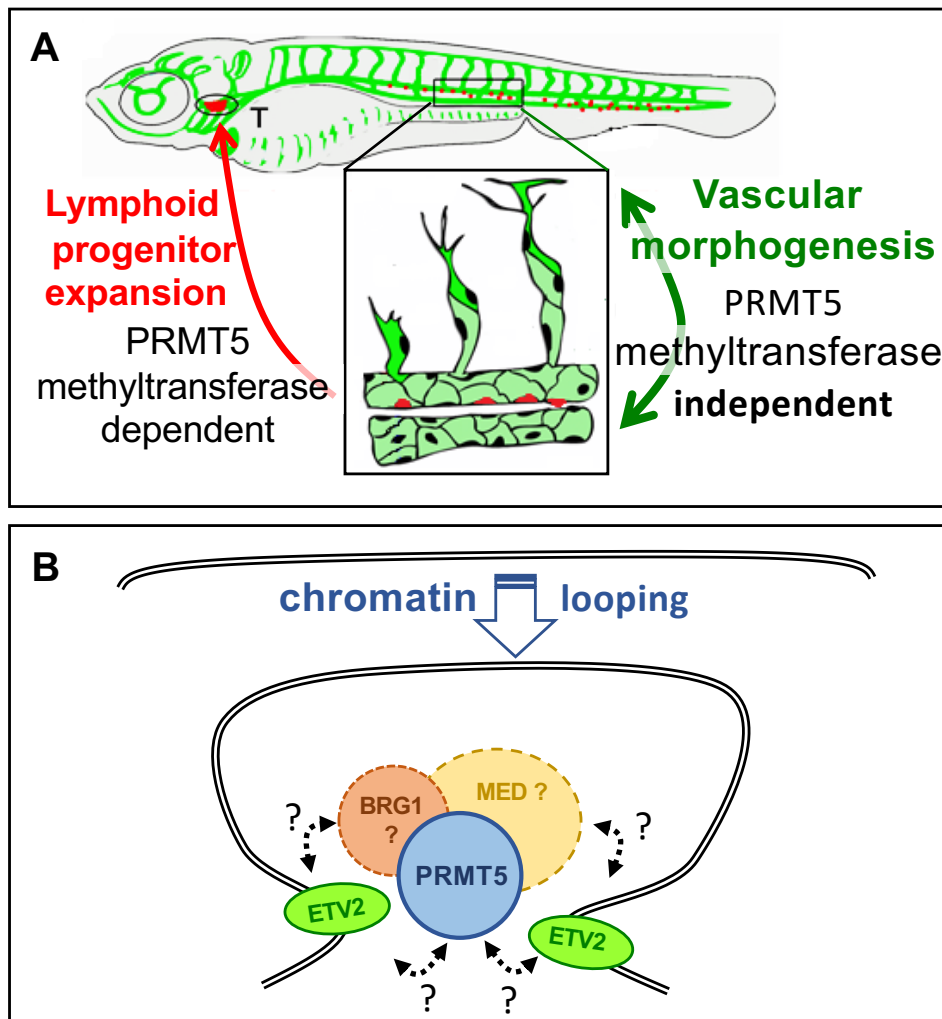

figureS1

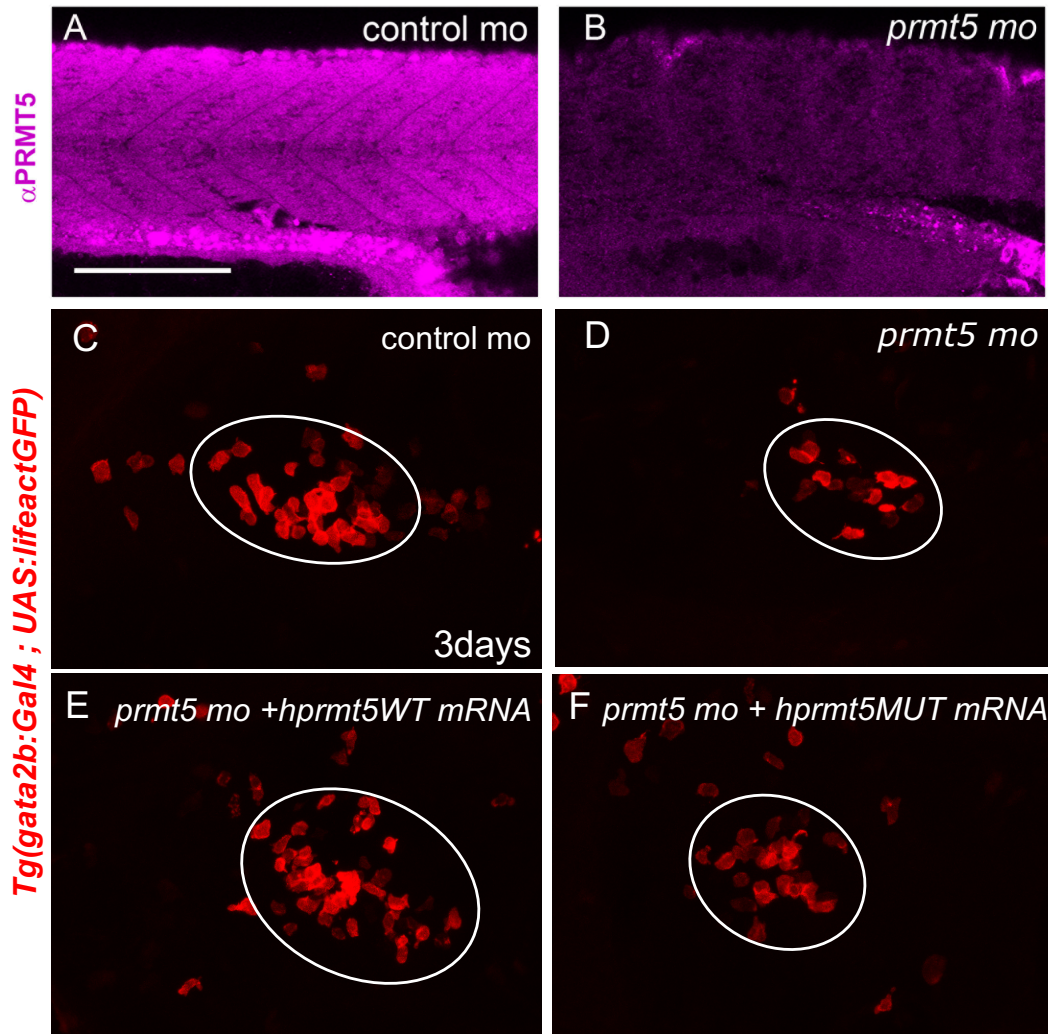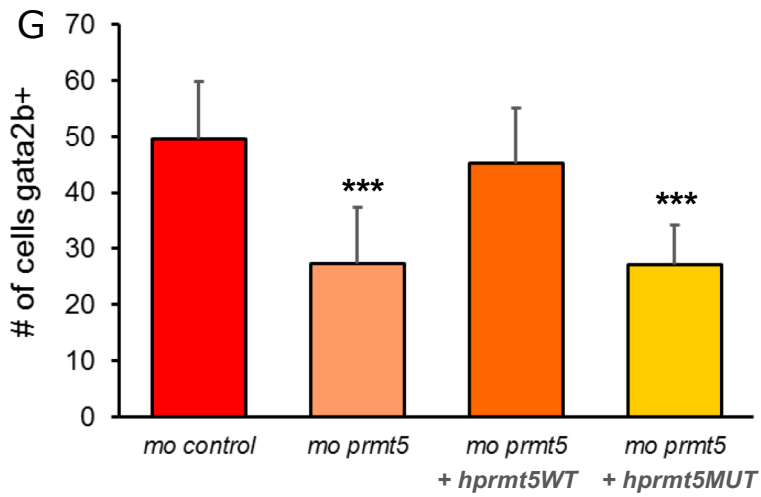

figure S2

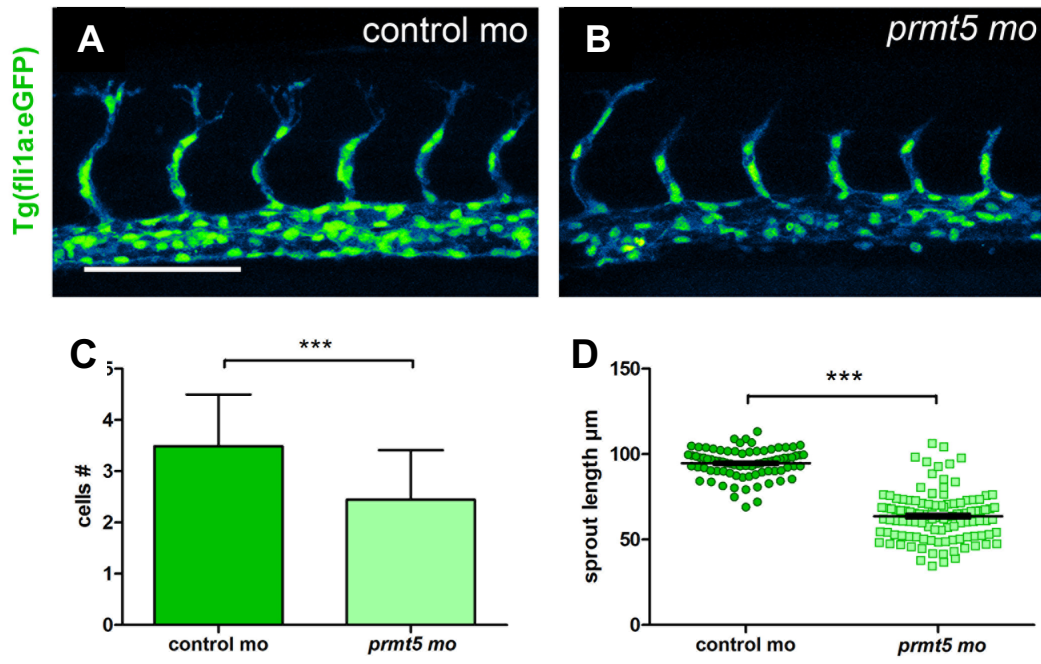

figure S3

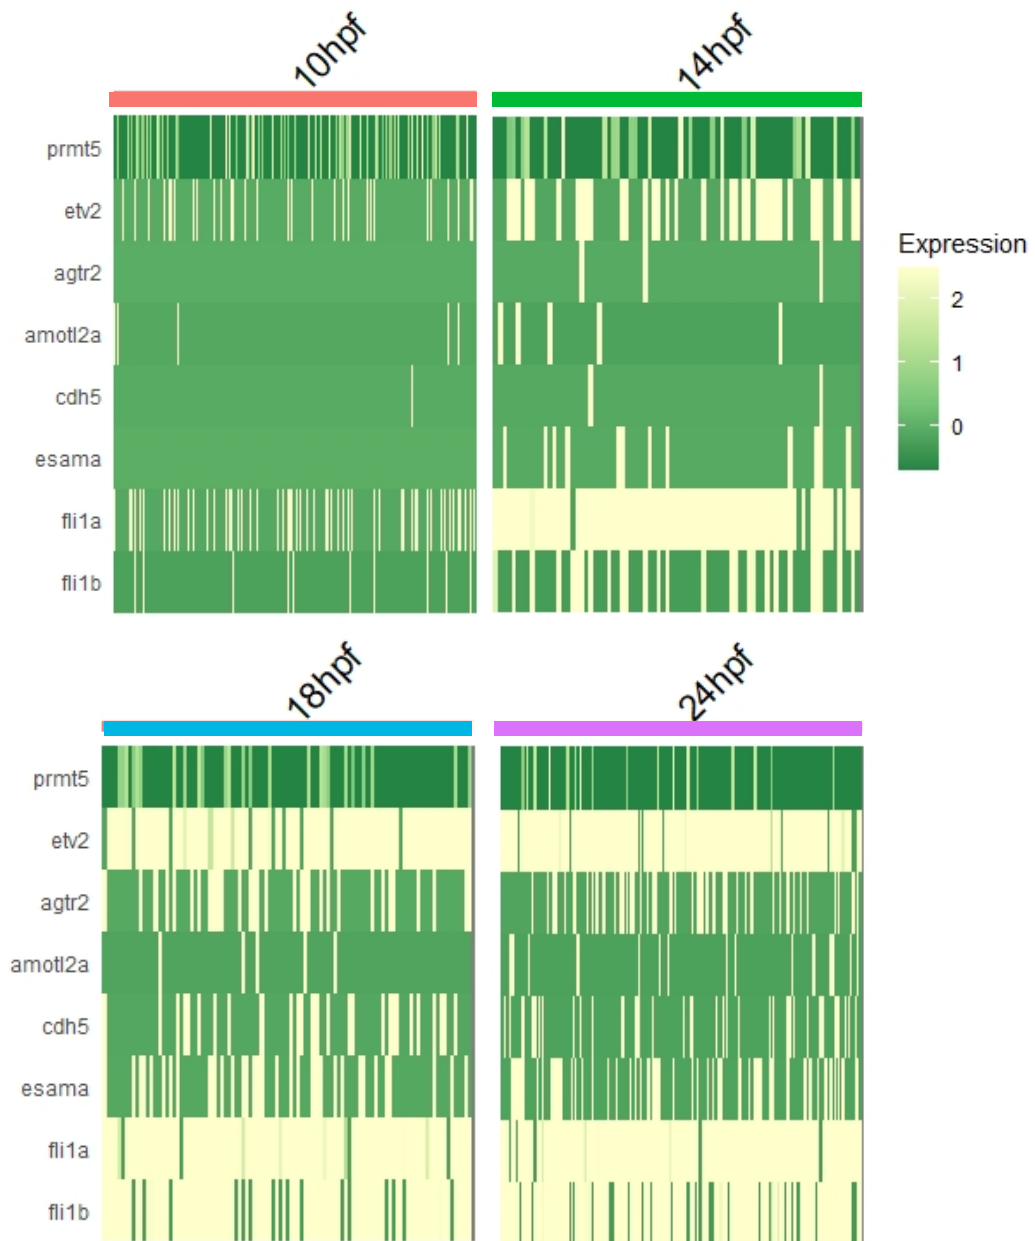

figure S4

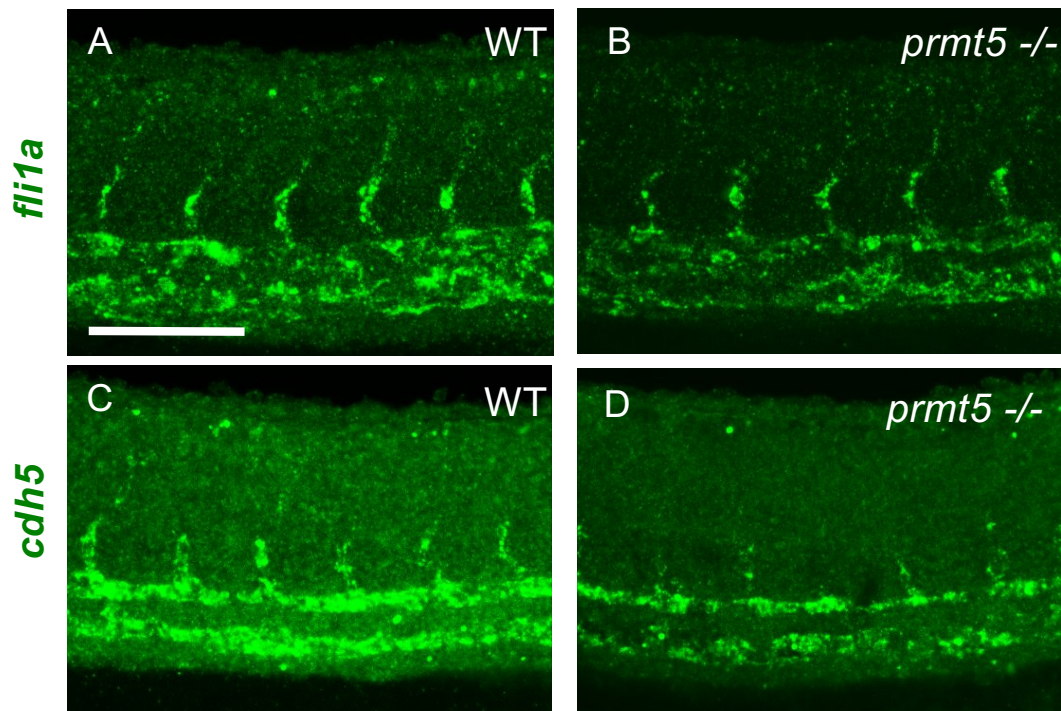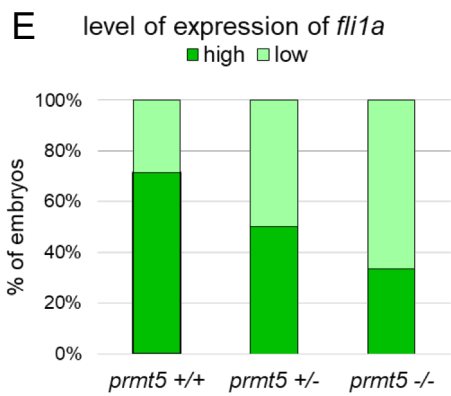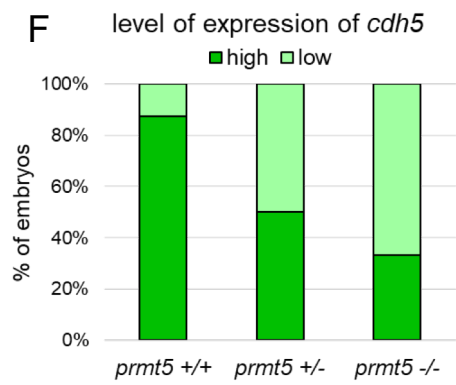

figure S5

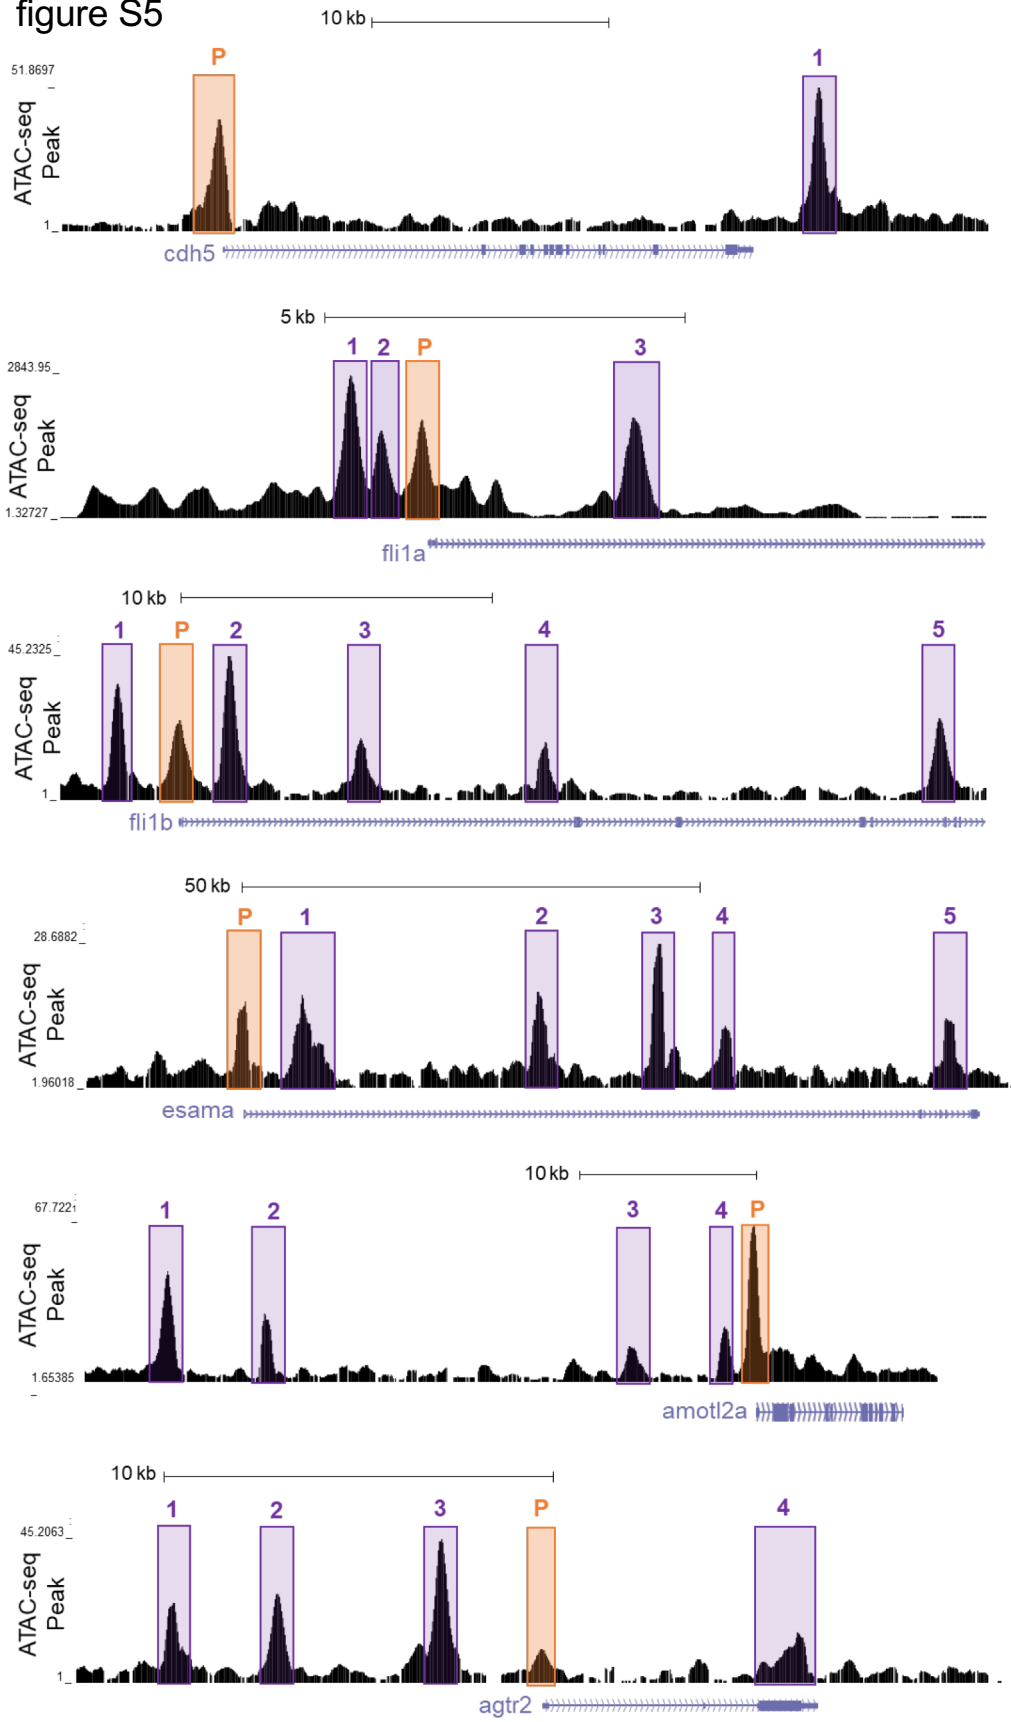



| Gene symbol    | Peak chr     | Peak start | Peak stop | ATAC-seq peak ID (fig. S5) | Distance of peakcenter to TSS |
|----------------|--------------|------------|-----------|----------------------------|-------------------------------|
| <i>fli1a</i>   | <i>chr18</i> | 46991096   | 46991446  | 1                          | 1 125                         |
| <i>fli1a</i>   | <i>chr18</i> | 46991648   | 46991909  | 2                          | 663                           |
| <i>fli1a</i>   | <i>chr18</i> | 46992111   | 46992384  | <i>p</i>                   | 0                             |
| <i>fli1a</i>   | <i>chr18</i> | 46994744   | 46995457  | 3                          | 2 866                         |
| <i>fli1b</i>   | <i>chr16</i> | 44785440   | 44785639  | 1                          | 1 971                         |
| <i>fli1b</i>   | <i>chr16</i> | 44787371   | 44787644  | <i>p</i>                   | 0                             |
| <i>fli1b</i>   | <i>chr16</i> | 44788987   | 44789387  | 2                          | 1 586                         |
| <i>fli1b</i>   | <i>chr16</i> | 44793201   | 44793495  | 3                          | 5 851                         |
| <i>fli1b</i>   | <i>chr16</i> | 44799123   | 44799348  | 4                          | <b>11 640</b>                 |
| <i>fli1b</i>   | <i>chr16</i> | 44811618   | 44812080  | 5                          | <b>24 462</b>                 |
| <i>esama</i>   | <i>chr10</i> | 32600339   | 32600842  | <i>p</i>                   | 0                             |
| <i>esama</i>   | <i>chr10</i> | 32607536   | 32607916  | 1                          | 6 894                         |
| <i>esama</i>   | <i>chr10</i> | 32632710   | 32633102  | 2                          | <b>32 357</b>                 |
| <i>esama</i>   | <i>chr10</i> | 32645662   | 32646247  | 3                          | <b>45 230</b>                 |
| <i>esama</i>   | <i>chr10</i> | 32653326   | 32653687  | 4                          | <b>52 511</b>                 |
| <i>esama</i>   | <i>chr10</i> | 32677711   | 32677978  | 5                          | <b>76 617</b>                 |
| <i>amotl2a</i> | <i>chr6</i>  | 27670527   | 27671187  | 1                          | <b>29 519</b>                 |
| <i>amotl2a</i> | <i>chr6</i>  | 27675738   | 27676044  | 2                          | <b>24 324</b>                 |
| <i>amotl2a</i> | <i>chr6</i>  | 27693946   | 27694363  | 3                          | 6 172                         |
| <i>amotl2a</i> | <i>chr6</i>  | 27698667   | 27698822  | 4                          | 1 629                         |
| <i>amotl2a</i> | <i>chr6</i>  | 27699920   | 27700375  | <i>p</i>                   | 0                             |
| <i>cdh5</i>    | <i>chr7</i>  | 45432986   | 45433605  | <i>p</i>                   | 0                             |
| <i>cdh5</i>    | <i>chr7</i>  | 45458271   | 45458821  | 1                          | <b>24 800</b>                 |
| <i>agtr2</i>   | <i>chr5</i>  | 24901724   | 24902030  | 1                          | <b>9 766</b>                  |
| <i>agtr2</i>   | <i>chr5</i>  | 24904437   | 24904720  | 2                          | 6 990                         |
| <i>agtr2</i>   | <i>chr5</i>  | 24908159   | 24908311  | 3                          | 3 233                         |
| <i>agtr2</i>   | <i>chr5</i>  | 24908459   | 24909026  | 4                          | 2 645                         |
| <i>agtr2</i>   | <i>chr5</i>  | 24917551   | 24917707  | <i>p</i>                   | 0                             |
| <i>agtr2</i>   | <i>chr5</i>  | 24917756   | 24918031  | 5                          | 6 525                         |

**Table S1-Chromatin profile of Prmt5 identified target genes in zebrafish**

ATAC-seq identified open chromatin regions surrounding characterized Prmt5 target genes and their distance to corresponding TSS (Quillien et al. 2017).

| Name/application       | Sequence 5'-3'                       |
|------------------------|--------------------------------------|
| sgRNA1-zPrmt5-Fwd      | TAGGGGTGGAACAGCGGCATACAC             |
| sgRNA1-zPrmt5-Rev      | AAACGTGTATGCCGCTGTTCCACC             |
| Genotyping-zPrmt5-Fwd  | CAAGACCTGTCCTGTTTGATGA               |
| Genotyping-zPrmt5-Rev  | GTGACTTTGCAGGGTCCAGT                 |
| XhoI-promocdh5-Fwd     | CCGCTCGAGCCAGGGGCATTTATCTTGG         |
| EcoRI-promocdh5-Rev    | CGGAATTCAACGATCGCATACCAGAGT          |
| Bsal-distenhcdh5-Fwd   | GTAACGGGTCTCCATGGGACAACAGTCAAATGTAGC |
| Bsal-distenhcdh5-Rev   | GTAACGGGTCTCCCTTAACTCGCATAACAATTTCCA |
| BamHI-gal4VP16-Fwd     | CGGGATCCGCCACCATGAAGCTACTGTCTTCTATC  |
| SpeI-gal4VP16-Rev      | GGACTAGTCTACATATCCAGAGCGCCG          |
| SclA-qPCR-Fwd          | ATGGATGACCTCCACAAAA                  |
| SclA-qPCR-Rev          | TCCCGGTTTAGCTTCTCATC                 |
| runx1-qPCR-Fwd         | AACTGGCGCTGCAACAAG                   |
| runx1-qPCR-Rev         | CATCATTTCGCCATCACT                   |
| cmyb-qPCR-Fwd          | GAACGGCTACGGTGGCTGGAA                |
| cmyb-qPCR-Rev          | CAGAGTCCAGCGAAGGACTGT                |
| EF1 $\alpha$ -qPCR-Fwd | GCATACATCAAGAAGATCGGC                |
| EF1 $\alpha$ -qPCR-Rev | GCAGCCTTCTGTGCAGACTTTG               |
| agtr2-qPCR-Fwd         | GTCATGTGCAAGCTGTGTGG                 |
| agtr2-qPCR-Rev         | AACACATGAACCAACCGGCC                 |
| esama-qPCR-Fwd         | AGACACCGAGGAGGATCTGG                 |
| esama-qPCR-Rev         | GCTGGGTTGGTGTGTATCC                  |
| amotl2a-qPCR-Fwd       | GGGCACTTTATGCTCAACTCTTG              |
| amotl2a-qPCR-Rev       | CGGCCTTGCTCTCGTCTT                   |
| fli1b-qPCR-Fwd         | TTCCATCAGCAGTCGTCTTG                 |
| fli1b-qPCR-Rev         | TAGTCCCTCCAGGTGATG                   |
| Etv2-qPCR-Fwd          | TGCCTTTGGAGGAAGAAAGA                 |
| Etv2-qPCR-Rev          | CTGTTGTTGGCAATCTGCTG                 |
| Cdh5-qPCR-Fwd          | CGAGATTGCTGATGGAGGAACGCC             |
| Cdh5-qPCR-Rev          | TGGCGAGGAGGGCACTGACA                 |
| fli1a-qPCR-Fwd         | CCAAACATGACGACCAATGAGA               |
| fli1a-qPCR-Rev         | GTGATCCGGAGACCACAGAGA                |

**Table S2- Sequences of oligonucleotides used in this study**
